# Supplementary material for: Association between fasting blood glucose and outcomes and mortality in acute ischaemic stroke patients with diabetes mellitus: a retrospective observational study in Wuhan, China
Source: PubMed Central journal article supplement — BMJ Open. 2020 Jun 23;10(6):e037291. doi: 10.1136/bmjopen-2020-037291 (PMC7312333; doi:10.1136/bmjopen-2020-037291), 2020-06-23
Supplement: bmjopen-2020-037291.draft_revisions.pdf [file bmjopen-2020-037291.draft_revisions.pdf]

# BMJ Open

BMJ Open is committed to open peer review. As part of this commitment we make the peer review history of every article we publish publicly available.

When an article is published we post the peer reviewers' comments and the authors' responses online. We also post the versions of the paper that were used during peer review. These are the versions that the peer review comments apply to.

The versions of the paper that follow are the versions that were submitted during the peer review process. They are not the versions of record or the final published versions. They should not be cited or distributed as the published version of this manuscript.

BMJ Open is an open access journal and the full, final, typeset and author-corrected version of record of the manuscript is available on our site with no access controls, subscription charges or pay-per-view fees (<http://bmjopen.bmj.com>).

If you have any questions on BMJ Open's open peer review process please email [info.bmjopen@bmj.com](mailto:info.bmjopen@bmj.com)

# BMJ Open

## Association between fasting blood glucose levels and outcomes and mortality in acute ischemic stroke patients with diabetes mellitus: an observational study in Wuhan, China

|                               |                                                                                                                                                                                                                                                                                                                                                                                                                                                                                                                             |
|-------------------------------|-----------------------------------------------------------------------------------------------------------------------------------------------------------------------------------------------------------------------------------------------------------------------------------------------------------------------------------------------------------------------------------------------------------------------------------------------------------------------------------------------------------------------------|
| Journal:                      | <i>BMJ Open</i>                                                                                                                                                                                                                                                                                                                                                                                                                                                                                                             |
| Manuscript ID                 | bmjopen-2020-037291                                                                                                                                                                                                                                                                                                                                                                                                                                                                                                         |
| Article Type:                 | Original research                                                                                                                                                                                                                                                                                                                                                                                                                                                                                                           |
| Date Submitted by the Author: | 29-Jan-2020                                                                                                                                                                                                                                                                                                                                                                                                                                                                                                                 |
| Complete List of Authors:     | Yao, Tao; Wuhan University Renmin Hospital, Department of Neurology<br>Zhan, Yanqiang; Wuhan University Renmin Hospital, Department of Neurology<br>Shen, Jing ; Wuhan University Renmin Hospital, Department of Neurology<br>Xu, Lu ; Wuhan University Renmin Hospital, Department of Neurology<br>Peng, Bo ; Wuhan University Renmin Hospital, Department of Neurology<br>Cui, Qin ; Wuhan University Renmin Hospital, Department of Neurology<br>Liu, Zhichao; Wuhan University Renmin Hospital, Department of Neurology |
| Keywords:                     | NEUROLOGY, Stroke < NEUROLOGY, Neuropathology < NEUROLOGY, DIABETES & ENDOCRINOLOGY, Diabetic neuropathy < DIABETES & ENDOCRINOLOGY                                                                                                                                                                                                                                                                                                                                                                                         |
|                               |                                                                                                                                                                                                                                                                                                                                                                                                                                                                                                                             |

SCHOLARONE™  
Manuscripts

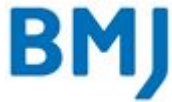

I, the Submitting Author has the right to grant and does grant on behalf of all authors of the Work (as defined in the below author licence), an exclusive licence and/or a non-exclusive licence for contributions from authors who are: i) UK Crown employees; ii) where BMJ has agreed a CC-BY licence shall apply, and/or iii) in accordance with the terms applicable for US Federal Government officers or employees acting as part of their official duties; on a worldwide, perpetual, irrevocable, royalty-free basis to BMJ Publishing Group Ltd ("BMJ") its licensees and where the relevant Journal is co-owned by BMJ to the co-owners of the Journal, to publish the Work in this journal and any other BMJ products and to exploit all rights, as set out in our [licence](#).

The Submitting Author accepts and understands that any supply made under these terms is made by BMJ to the Submitting Author unless you are acting as an employee on behalf of your employer or a postgraduate student of an affiliated institution which is paying any applicable article publishing charge ("APC") for Open Access articles. Where the Submitting Author wishes to make the Work available on an Open Access basis (and intends to pay the relevant APC), the terms of reuse of such Open Access shall be governed by a Creative Commons licence – details of these licences and which [Creative Commons](#) licence will apply to this Work are set out in our licence referred to above.

Other than as permitted in any relevant BMJ Author's Self Archiving Policies, I confirm this Work has not been accepted for publication elsewhere, is not being considered for publication elsewhere and does not duplicate material already published. I confirm all authors consent to publication of this Work and authorise the granting of this licence.

1  
2  
3  
4  
5  
6  
7  
8  
9  
10  
11  
12  
13  
14  
15

# Association between fasting blood glucose levels and outcomes and mortality in acute ischemic stroke patients with diabetes mellitus: an observational study in Wuhan, China

16  
17

## Full names for all authors:

18  
19  
20  
21

Tao Yao, Yan-Qiang Zhan, Jing Shen, Lu Xu, Bo Peng, Qin Cui, and Zhi-Chao Liu\*

22  
23

## Institutional addresses for all authors:

24  
25  
26  
27  
28

Department of Neurology, Wuhan University, Renmin Hospital, Wuhan, 430060, Hubei Province, P.R.C.

29  
30

## Email addresses for all authors:

31  
32

Tao Yao: yaotao@whu.edu.cn; <https://orcid.org/0000-0001-8450-7201>

33  
34

Yan-Qiang Zhan: zhanyq77@163.com; <https://orcid.org/0000-0001-7265-7368>

35  
36

Jing Shen: 81642309@qq.com

37  
38

Lu Xu: 1171505714@qq.com

39  
40

Bo Peng: pengbo\_whu@hotmail.com

41  
42

Qin Cui: cuiqin2468@163.com; <https://orcid.org/0000-0002-8165-246X>

43  
44  
45  
46  
47  
48  
49  
50  
51  
52  
53  
54  
55  
56  
57  
58  
59  
60

Zhi-Chao Liu: zhichao.liu@whu.edu.cn; <https://orcid.org/0000-0001-9548-7883>

## Corresponding author:

**Zhi-Chao Liu** Email: zhichao.liu@whu.edu.cn; Tel:86 13986160231

## ABSTRACT

**Objective** To evaluate the predictive power of an acute high blood glucose level on unfavorable outcomes and mortality in diabetes mellitus(DM) patients after acute ischemic stroke (AIS).

**Study design** A population-based, retrospective observational study. The clinical data were collected. At the time of admission, the NHSS score was used to assess stroke severity and the fasting blood glucose(FBG) level was determined. The modified Rankin scale (mRS) was used to assess functional outcome at 90 days, as follows: 3-6, an unfavorable outcome; and 6, death.

**Setting** The study was conducted in Wuhan, China.

**Participants** A total of 568 AIS patients with DM and 353 AIS patients without DM as a control group were included.

**Results** The FBG levels of AIS patients with DM were significantly higher as compared to AIS patients without DM [7.37 mmol/L (IQR, 5.99 – 10.10 mmol /L) vs. 6.19 mmol/L (5.38-7.20 mmol / L);  $P < 0.0001$ ]. An elevated FBG level at the time of admission was associated with an increased NHSS score ( $r=0.417$ ,  $P < 0.0001$ ) in the study group. Multivariate logistic regression analysis of confounding factors showed that a high FBG level at the time of admission was independently predictive of an unfavorable outcome 90 days after admission [odds ratio (OR), 1.249 (1.137-1.371) ;  $P < 0.0001$ ] and mortality [OR, 1.096 (1.012-1.187) ;  $P < 0.05$  ].

**Conclusions** High fasting blood glucose levels are associated with unfavorable outcomes and mortality after acute ischemic stroke in Chinese patients with DM. Fasting blood glucose levels on admission can be used as a useful predictor of short-term outcomes, facilitating the management of AIS patients with DM.

### Strengths and limitations of this study

- There are only a few studies have evaluated the association between FBG and outcome of AIS patients with DM. The strength of the study is to evaluate the predictive effect of the FBG level at admission as an acute blood glucose index on the outcome.
- The study included AIS patients without DM as a control group and compared data including FBG at admission generated from both groups.
- The study routinely incorporated a wide range of factors that may influence functional outcomes to correct the effects of confounding factors.
- This was a single-center study with a limited sample size, female and male patients were not balanced in absolute numbers in the study.

## INTRODUCTION

Diabetes mellitus(DM) is recognized as an important risk factor for ischemic stroke.<sup>1 2</sup> Previous epidemiologic investigations have confirmed that patients with DM have a high disability rate and risk of in-hospital death after an acute ischemic stroke (AIS).<sup>3 4</sup> A recent study involving a Chinese population included 10,331 patients with DM who were confirmed to have an AIS and shown to be at high risk for in-hospital death.<sup>5</sup> Indeed, assessment of functional outcome and mortality risk among AIS patients with diabetes is a common concern for both patients and clinicians.

Acute hyperglycemia is common in AIS patients with and without DM.<sup>6</sup> Many studies have shown that acute hyperglycemia at the time of admission is associated with AIS infarct volume<sup>7</sup> and can independently predict functional outcome and risk of death;<sup>8-10</sup> however, there is a lack of studies focusing on DM patients and hyperglycemia at the time of admission has controversial predictive value with respect to functional outcomes. It has been reported that high blood glucose levels in DM patients have no significant predictive value for functional outcomes and risk of death;<sup>11</sup> Moreover, two recent studies have confirmed that high blood glucose levels are predictive of functional outcomes in diabetic and non-diabetic patients complicated by cerebral infarction.<sup>12 13</sup> Therefore, it is necessary to clarify the correlation between acute blood glucose levels and functional outcomes in DM patients which can facilitate accurate prediction of prognosis and provide theoretical support for the development of glycemic control strategies after an ischemic stroke.

Because fasting blood glucose(FBG) can minimize the effects of diet,<sup>14</sup> the FBG level is considered a more reliable blood glucose level detection tool than random blood glucose levels.<sup>15</sup> Compared to random blood glucose levels, a fasting glucose level provides a stronger predictor of functional outcomes.<sup>16 17</sup>

In conclusion, this study aimed to investigate Chinese acute ischemic stroke patients with DM and to determine the correlation between the FBG level at the time of admission and functional outcomes as well as the risk of death.

## METHODS

### Patients and Study Design

This retrospective observational study collected information involving AIS patients with DM who were admitted to the Department of Neurology of the Renmin Hospital of Wuhan University from January 2018 to June 2019. The diagnostic criteria for acute cerebral infarction are in accordance with World Health Organization standards.<sup>18</sup> Patient with DM is defined as patients with a history of DM before admission or those taking drugs or insulin for hypoglycemic treatment. Patients must meet the below criteria: 1. onset within 24 hours; 2.  $\geq 18$  years of age; and 3. in the case of a recurrent cerebral infarction, a modified Rankin Scale (mRs)  $\leq 2$ .<sup>19</sup> Patients with psychoses, severe bone joint diseases, and other neurologic diseases that affect functional outcomes were excluded from the study.

In this study, the same basic information and clinical data of AIS patients without DM admitted to the same hospital from January to June 2018 were also collected as a control group. The study was approved by the Ethics Committee of the Renmin Hospital of Wuhan University. Informed consent was signed for all patients participating in the study.

### Clinical Variables and Neuroimaging

All patients completed diagnostic testing after admission, including routine serologic testing, neuroimaging, intracranial and extravascular studies, and a cardiac examination. The clinical data were routinely collected at the time of admission included gender, age, BMI, notation of vascular risk factors (including hypertension, DM, coronary heart disease, atrial fibrillation, hypercholesterolemia, stroke history, and smoking history), and systolic/diastolic blood pressure. The severity of stroke at the time admission was assessed using the National Institutes of Health Stroke Scale (NIHSS).<sup>20</sup> Reperfusion therapy included IV thrombolysis with rtPA and endovascular therapy with intra-arterial thrombolysis or mechanical thrombectomy. The causes of stroke were grouped according to the Trial of Org 10172 in Acute Stroke

1  
2  
3 Treatment (TOAST),<sup>21</sup> as follows: large-vessel occlusive; small-vessel occlusive; cardioembolic; and other and  
4 unknown. The patients underwent a CT scan and/or MRI examination within 24-48 h after admission. The diagnosis of  
5 cerebral infarction was based on the CT scan and/or MRI imaging findings.  
6  
7

### 8 **End Points and Follow-up**

9 The mRs score at 90 days was used as an indicator of functional outcomes, as follows:  $\leq 2$ , good outcome; 3-6,  
10 unfavorable outcome; and 6, death. Two specially-trained neurologic nurses were responsible for assessing functional  
11 outcomes of AIS patients by calling patients or their family members once a month.  
12  
13  
14

### 15 **Laboratory Testing**

16 To minimize the impact of diet on the blood glucose level, FBG levels were used as an indicator of the acute blood  
17 glucose level.<sup>14 15</sup> Blood samples were collected at approximately 7:30 am on the first day after admission after fasting  
18 for at least 8 hours. Glycosylated hemoglobin (HbA1c) was tested using standard test methods.  
19  
20  
21

### 22 **Statistical Analysis**

23 Data following normal distribution were described using the mean  $\pm$  standard deviation. Data following a non-normal  
24 distribution were described using the median (quartiles). Categorical variables were described using a percentage. The  
25 Mann-Whitney U test was used to compare the non-normal distribution between two groups. The relationship  
26 between two continuous variables was analyzed by the Spearman correlation. We used univariate logistic regression to  
27 analyze the relationship between gender, age, BMI, vascular risk factors, systolic/diastolic blood pressure, NIHSS score,  
28 stroke TOAST classification, HbA1c, the FBG level, and outcomes of acute cerebral infarction at 90 days and  
29 death. Factors giving a  $P < 0.1$  were re-analyzed using multivariate regression analysis to determine the correlation  
30 between the FBG level and functional outcomes of cerebral infarction, as well as death. The results are expressed by ORs  
31 and 95% CIs. Moreover, we performed quartiles based on FBG levels as follows: quartile 1 (FBG  $\leq 6.00$  mmol/L);  
32 quartile 2 (FBG 6.01-7.37 mmol/L); quartile 3 (7.38-10.10 mmol/L); and quartile 4 (FBG  $\geq 10.11$  mmol/L). Kaplan-  
33 Meier survival curves were used to analyze the value of the FBG level for predicting death. SPSS (version 25.0; SPSS,  
34 Inc., Chicago, IL, USA) was used for statistical analysis and a  $P < 0.05$  indicates a significant difference.  
35  
36  
37  
38  
39  
40

### 41 **Patient and public involvement**

42 No patients were involved with design, data provision, analysis and publication of the study.  
43  
44

## 45 **RESULTS**

### 46 **Baseline Characteristics of the Study Population**

47 A total of 568 AIS patients with DM including 377 males and 191 females, were enrolled in this study and all were  
48 followed up. The median age of the patients was 65 years (IQR, 55-74 years), and the mean BMI was  
49  $24.10 \pm 2.96$  kg/m<sup>2</sup>. The median NIHSS score at the time of admission was 4 (IQR, 2-10). 32 of 568 AIS patients have  
50 received reperfusion therapy, including 28 patients with IV rtPA thrombolysis and 7 patients with endovascular  
51 treatment. There were 226 patients (39.8%) with unfavorable outcomes, including 58 deaths (10.2%). Of the 58 deaths in  
52 this study, 36 (62.1%) died of increased intracranial pressure, 10 (17.2%) died of cardiac diseases such as heart failure,  
53 myocardial infarction or arrhythmia, and 12 (20.7%) died of other causes such as severe pneumonia, stress ulcer bleeding  
54 and pulmonary embolism. Moreover, 14 (24.1%) had symptomatic intracerebral hemorrhages among the 58 deaths. In  
55 the control group, 353 AIS patients without DM were enrolled. The baseline data of all patients at the time of admission  
56 are shown in Table 1.  
57  
58  
59  
60

## Main Results

The FBG levels of the study group (AIS patients with DM) were significantly higher than the control group (AIS patients without DM) [7.37 mmol/L (IQR, 5.99 – 10.10 mmol /L) vs. 6.19 mmol/L (5.38-7.20 mmol / L;  $Z = -9.127$ ,  $P < 0.0001$ ; Figure 1]. The NHISS scores of AIS patients with DM at the time of admission increased with elevation of the FBG levels. There was a moderately significant positive correlation between the NHISS score and the FBG level ( $r=0.417$ ,  $P<0.0001$ ). The results are shown in Figure 2. The results also showed that FBG levels had no significant correlation with other risk factors, including smoking, hypertension, coronary heart disease, hypercholesterolemia history, a history of stroke ( $P>0.05$ ).

### FBG level and functional outcome at 90 days

The FBG levels of 226 patients with unfavorable functional outcomes at 90 days were significantly higher than patients with favorable functional outcomes [9.64 mmol/L (IQR, 7.40 – 12.60 mmol /L vs. 6.56 mmol/L (IQR, 5.64 – 7.86 mmol /L;  $Z=- 11.176$ ,  $P < 0.0001$ ; Figure 3]. Univariate regression analysis showed that unfavorable functional outcomes were significantly correlated with age, male gender, atrial fibrillation, coronary heart disease, NHISS score, small-vessel occlusive, HbA1c, and the FBG level ( $P<0.05$ ). Multivariate logistic regression analysis was performed on outcome-indicating factors. The results showed that age (OR, 1.023; 95% CI, 1.001-1.046;  $P = 0.037$ ), NHISS score (OR, 1.422; 95% CI, 1.308-1.545;  $P < 0.0001$ ), small-vessel occlusive (OR, 0.237; 95% CI, 0.061-0.929;  $P = 0.039$ ), and FBG level (OR, 1.249; 95% CI, 1.137-1.371;  $P < 0.0001$ ) were independent predictive factors of functional outcome for AIS patients with DM (Table 2).

### FBG levels and mortality at 90 days

The FBG levels of 58 non-surviving patients at 90 days were significantly higher than surviving patients [10.41 mmol/L (IQR, 8.14 – 15.29 mmol /L vs. 7.10 mmol/L (IQR, 5.88 – 9.65 mmol /L;  $Z=-6.851$ ,  $P < 0.0001$ ; Figure 4]. Univariate regression analysis of non-surviving patients showed that atrial fibrillation, coronary heart disease, NHISS score, small-vessel occlusive disease, HbA1c, and FBG level were significantly associated with death ( $P<0.05$ ). Multivariate logistic regression analysis was performed on functional outcome-indicating factors and the results showed that atrial fibrillation (OR, 2.851; 95% CI, 1.159-7.012;  $P = 0.023$ ), NHISS score (OR, 1.133; 95% CI, 1.076-1.192;  $P < 0.0001$ ), small-vessel occlusive (OR, 0.087; 95% CI, 0.011-0.669;  $P = 0.019$ ), HbA1c (OR, 1.486; 95% CI, 1.227-1.779;  $P < 0.0001$ ), and FBG levels (OR, 1.096; 95% CI, 1.012-1.187;  $P=0.025$ ; Table 2) were independent predictive factors of death for AIS patients with DM.

We used Kaplan- Meier curves to compare the quartiles of FBG levels and time-to-death after admission. The results showed that the risk of death in the two highest quartile groups (FBG 7.38-10.10 mmol/L and  $\geq 10.11$  mmol/L groups) was significantly higher than the two lowest quartile groups (FBG  $\leq 6.00$  mmol/L and 6.01-7.37 mmol/L groups;  $P < 0.0001$ ; Figure 5).

## DISCUSSION

We evaluated the FBG levels at the time of admission as an indicator of functional outcome and risk of death among Chinese AIS patients combined with DM. This study showed that FBG levels increased with elevated NHISS scores at the time of admission. Moreover, after adjustment for potential influencing factors, the FBG level at the time of admission was an independent predictor for functional outcome and mortality in AIS patients with DM.



1  
2  
3  
4 Acute stroke may be accompanied by neuroendocrine disorders, as well as inflammation, resulting in an acute blood  
5 glucose elevation.<sup>22</sup> Previous studies focusing on acute blood glucose elevations generally used fasting or random blood  
6 glucose levels at the time of admission an indicator of acute blood glucose. A meta-analysis involving 32 studies showed  
7 that acute stroke patients with acute high blood glucose levels are a widespread finding, and the proportion of high blood  
8 glucose levels in acute stroke patients with and without DM reached 8%-63% and 39%-83%, respectively.<sup>6</sup> A number of  
9 studies have shown that high blood glucose levels at the time of admission are closely related to the functional outcome  
10 of patients with AIS.<sup>9 10 23 24</sup> Masrur et al.<sup>9</sup> studied 1408 AIS patients who received intravenous thrombolysis and showed  
11 that an acute high blood glucose level at the time of admission increased the risk of unfavorable functional outcomes and  
12 death. Snarska et al.<sup>10</sup> and Zhao et al.<sup>25</sup> observed AIS patients and reported that a high blood glucose level at the time of  
13 admission was significantly associated with an unfavorable functional outcome and risk of in-hospital death. Moreover,  
14 several previous studies involving AIS patients without DM showed that high blood glucose levels were also closely  
15 related to unfavorable functional outcomes and risk of death.<sup>24 26</sup>

16  
17  
18  
19 Because the focus of previous studies has been on AIS patients only or AIS patients without DM, acute blood glucose  
20 levels at the time of admission among AIS patients with DM has not been adequately addressed, and thus the predictive  
21 value for unfavorable functional outcomes or mortality has not been established.<sup>12 13 24 26-28</sup> Yao et al.<sup>24</sup> and Hu et  
22 al.<sup>28</sup> showed that in AIS patients without DM, high FBG levels predicted unfavorable functional outcomes and death, but  
23 had insignificant predictive value for AIS patients with DM. Tsuga et al.<sup>12</sup> and Sung et al.<sup>13</sup> performed subgroup analysis  
24 on AIS patients with and without DM and showed that acute blood glucose levels in both groups had predictive power  
25 for functional outcomes. Recently a meta-analysis incorporated 13 studies that showed that there was no statistical  
26 difference in prognostic indicators between AIS patients with and without DM.<sup>29</sup> In this study, we used baseline FBG  
27 levels at the time of admission as a marker for the acute blood glucose level. The results revealed additional evidence for  
28 the predictive value of high acute blood glucose levels on functional outcomes and high risk of death in AIS patients with  
29 DM.  
30  
31  
32

33 The mechanism underlying the predictive value of high blood glucose levels at the time of admission on functional  
34 outcome and mortality is not fully understood; however, the correlation between a high blood glucose level after AIS and  
35 the severity of stroke and unfavorable functional outcomes may be summarized as follows. First, a high blood glucose  
36 level can affect the balance between the coagulation and fibrinolytic systems, resulting in impaired recanalization.<sup>30 31</sup>  
37 Second, a high blood glucose level may affect endothelium-derived nitric oxide-mediated vasodilation, thereby reducing  
38 intracranial blood flow and reperfusion at the infarct site.<sup>32 33</sup> *In vitro* studies have shown that nitric oxide synthase 3 gene  
39 expression and nitric oxide production are reduced in hyperglycemic conditions.<sup>34 35</sup> Clinical studies have shown that  
40 cerebral infarction tissue reperfusion is decreased and infarct volume is increased in patients with high blood glucose  
41 levels.<sup>36-38</sup> Third, a high blood glucose level may generate oxidative stress, leading to neuroendocrine disorders and  
42 inflammatory reactions,<sup>39 40</sup> blood-brain barrier disruption,<sup>41</sup> and eventually reperfusion injury.<sup>37 42</sup> Two clinical studies  
43 have shown that ischemic stroke patients with acute high blood glucose levels are at increased risk for hemorrhagic  
44 transformation,<sup>43</sup> and cerebral hemorrhage in patients with thrombolysis leads to unfavorable functional outcomes.<sup>44</sup> It  
45 has been suggested that high blood glucose levels may increase the risk of vascular reperfusion injury. Fourth, patients  
46 with DM generally have insufficient insulin secretion or insulin resistance, and therefore anaerobic glycolysis may  
47 increase in patients with high blood glucose levels,<sup>45 46</sup> resulting in brain tissue lactic acid accumulation and internal  
48 environment disorders that aggravate brain tissue damage.<sup>47</sup> All of these pathologic changes together cause severe stroke  
49 and secondary functional outcomes and death.  
50  
51  
52  
53  
54  
55

### 56 **Strengths and limitations**

57 This study had the following highlights. First, Only a few studies have evaluated the association between FBG levels and  
58 outcomes of AIS patients with DM. Because the FBG levels were not affected by diet, the results better reveal blood  
59  
60

1  
2  
3 glucose levels as a function of stress, this study used FBG at admission as an acute blood glucose index. Second, this  
4 study included AIS patients without DM as a control group and compared data including FBG at admission generated  
5 from both groups. Finally, this study routinely incorporated a wide range of factors that may influence functional  
6 outcomes to correct the effects of confounding factors.  
7

8 This study also had limitations. First, this was a single-center study with a limited sample size. Additional prospective  
9 multicenter studies are needed. Moreover, female and male patients were not balanced in absolute numbers in the  
10 study. Combined with previous research results,<sup>48</sup> we analyzed the possible reason of gender imbalance that male  
11 patients with DM had a higher incidence of AIS.  
12  
13

## 14 15 **CONCLUSIONS**

16 In conclusion, our results suggest that high FBG levels are associated with unfavorable outcomes and mortality of AIS  
17 patients with DM. In the Chinese population, high FBG levels can be used as a useful predictor of short-term outcomes,  
18 facilitating the management of AIS patients with DM.  
19

20  
21 **Author affiliations** Department of Neurology, Wuhan University, Renmin Hospital, Wuhan, 430060, Hubei Province,  
22 P.R.C.  
23

24  
25 **Acknowledgments** The authors would like to acknowledge all the study participants. We would like to thank Dr. Huan  
26 Yang for proofreading English language assistance.  
27

28  
29 **Contributors** TY analyzed and interpreted the results and wrote this manuscript text. TY, YQZ, JS, BP, LX, and QC had  
30 full access to all of the data in the study and take responsibility for the integrity of the data and the accuracy of the data  
31 analysis. YT, YQZ, and ZCL designed the study. All authors reviewed and approved the manuscript.  
32  
33

34  
35 **Funding** This work was supported by the Guide Foundation of Wuhan University (RMYD2018M09).  
36

37  
38 **Disclaimer** The funders had no role in the study design, data collection, analysis, interpretation or decision to submit the  
39 manuscript for publication.  
40

41  
42 **Competing interests** None declared.  
43

44  
45 **Patient consent for publication** Not required.  
46

47  
48 **Ethics approval** This study is approved by the Ethics Committee of Wuhan University Renmin hospital(No.  
49 WDRY2017-K038).  
50

51  
52 **Provenance and peer review** Not commissioned; externally peer reviewed.  
53

54  
55 **Data availability statement** Data are available upon reasonable request.  
56  
57  
58  
59  
60

## References

- 1 Cui R, Iso H, Yamagishi K, *et al*. Diabetes mellitus and risk of stroke and its subtypes among Japanese: the Japan public health center study. *Stroke* 2011;42:2611-4.
- 2 O'Donnell M J, Chin S L, Rangarajan S, *et al*. Global and regional effects of potentially modifiable risk factors associated with acute stroke in 32 countries (INTERSTROKE): a case-control study. *Lancet* 2016;388:761-75.
- 3 Andersen K K, Olsen T S. One-month to 10-year survival in the Copenhagen stroke study: interactions between stroke severity and other prognostic indicators. *J Stroke Cerebrovasc Dis* 2011;20:117-23.
- 4 Reeves M J, Vaidya R S, Fonarow G C, *et al*. Quality of care and outcomes in patients with diabetes hospitalized with ischemic stroke: findings from Get With the Guidelines-Stroke. *Stroke* 2010;41:e409-17.
- 5 Si Y, Xiao X, Xiang S, *et al*. Mortality-specific comorbidity among inpatients with ischemic stroke in West China. *Acta Neurol Scand* 2019.
- 6 Capes S E, Hunt D, Malmberg K, *et al*. Stress hyperglycemia and prognosis of stroke in nondiabetic and diabetic patients: a systematic overview. *Stroke* 2001;32:2426-32.
- 7 Baird T A, Parsons M W, Phan T, *et al*. Persistent poststroke hyperglycemia is independently associated with infarct expansion and worse clinical outcome. *Stroke* 2003;34:2208-14.
- 8 Powers W J, Rabinstein A A, Ackerson T, *et al*. 2018 Guidelines for the Early Management of Patients With Acute Ischemic Stroke: A Guideline for Healthcare Professionals From the American Heart Association/American Stroke Association. *Stroke* 2018;49:e46-e110.
- 9 S M, M C, DL B, *et al*. Association of Acute and Chronic Hyperglycemia With Acute Ischemic Stroke Outcomes Post-Thrombolysis: Findings From Get With The Guidelines-Stroke. *Journal of the American Heart Association* 2015;4:e002193.
- 10 Snarska K K, Bachorzewska-Gajewska H, Kapica-Topczewska K, *et al*. Hyperglycemia and diabetes have different impacts on outcome of ischemic and hemorrhagic stroke. *Arch Med Sci* 2017;13:100-08.
- 11 WY X, YC X, YW W, *et al*. Observation of elevated fasting blood glucose and functional outcome after ischemic stroke in patients with and without diabetes. *Oncotarget* 2017;8:67980-89.
- 12 J Z, R G, A K-B, *et al*. Different effect of hyperglycemia on stroke outcome in non-diabetic and diabetic patients--a cohort study. *Neurological research* 2012;34:72-9.
- 13 JY S, CI C, YC H, *et al*. Comparison of admission random glucose, fasting glucose, and glycated hemoglobin in predicting the neurological outcome of acute ischemic stroke: a retrospective study. *PeerJ* 2017;5:e2948.
- 14 S M, L G, C L, *et al*. Impact of time since last caloric intake on blood glucose levels. *European journal of epidemiology* 2011;26:719-28.
- 15 Standards of medical care in diabetes--2014. *Diabetes Care* 2014;37 Suppl 1:S14-80.
- 16 E O, S F, AAM Z, *et al*. Impaired fasting glucose is associated with unfavorable outcome in ischemic stroke patients treated with intravenous alteplase. *Journal of neurology* 2018;265:1426-31.
- 17 W C, Y L, F W, *et al*. Higher fasting glucose next day after intravenous thrombolysis is independently associated with poor outcome in acute ischemic stroke. *Journal of stroke and cerebrovascular diseases : the official journal of National Stroke Association* 2015;24:100-3.
- 18 S H. Experience from a multicentre stroke register: a preliminary report. *Bulletin of the World Health Organization* 1976;54:541-53.
- 19 JC v S, PJ K, MC V, *et al*. Interobserver agreement for the assessment of handicap in stroke patients. *Stroke* 1988;19:604-7.
- 20 T B, HP A, CP O, *et al*. Measurements of acute cerebral infarction: a clinical examination scale. *Stroke*

- 1989;20:864-70.
- 21 KP M, PN K, HP A, *et al.* Accuracy of initial stroke subtype diagnosis in the TOAST study. Trial of ORG 10172 in Acute Stroke Treatment. *Neurology* 1995;45:1975-9.
- 22 KM D, SS B, JC P. Stress hyperglycaemia. *Lancet (London, England)* 2009;373:1798-807.
- 23 F W, B J, L K, *et al.* Higher admission fasting plasma glucose levels are associated with a poorer short-term neurologic outcome in acute ischemic stroke patients with good collateral circulation. *Acta diabetologica* 2018;55:703-14.
- 24 Yao M, Ni J, Zhou L, *et al.* Elevated Fasting Blood Glucose Is Predictive of Poor Outcome in Non-Diabetic Stroke Patients: A Sub-Group Analysis of SMART. *PLoS One* 2016;11:e0160674.
- 25 L Z, L W, M L, *et al.* Hyperglycemia is associated with poor in-hospital outcome in elderly patients with acute ischemic stroke. *Medicine* 2019;98:e16723.
- 26 Xing L, Liu S, Tian Y, *et al.* C-R Relationship between Fasting Plasma Glucose and Unfavorable Outcomes in Patients of Ischemic Stroke without Diabetes. *J Stroke Cerebrovasc Dis* 2019;28:1400-08.
- 27 SK M, MP R, M B, *et al.* Admission hyperglycemia an independent predictor of outcome in acute ischemic stroke: A longitudinal study from a tertiary care hospital in South India. *Nigerian journal of clinical practice* 2017;20:573-80.
- 28 GC H, SF H, YM C, *et al.* Relationship of initial glucose level and all-cause death in patients with ischaemic stroke: the roles of diabetes mellitus and glycosylated hemoglobin level. *European journal of neurology* 2012;19:884-91.
- 29 XL D, F G, SJ X, *et al.* Influence of blood glucose level on the prognosis of patients with diabetes mellitus complicated with ischemic stroke. *Journal of research in medical sciences : the official journal of Isfahan University of Medical Sciences* 2018;23:10.
- 30 ME S, SN v d C, M L, *et al.* Hyperglycemia stimulates coagulation, whereas hyperinsulinemia impairs fibrinolysis in healthy humans. *Diabetes* 2006;55:1807-12.
- 31 NT G, VR V, U K, *et al.* Factor VIIa and tissue factor procoagulant activity in diabetes mellitus after acute ischemic stroke: impact of hyperglycemia. *Thrombosis and haemostasis* 2007;98:1007-13.
- 32 I F, R B. Molecular mechanisms involved in the regulation of the endothelial nitric oxide synthase. *American journal of physiology Regulatory, integrative and comparative physiology* 2003;284:R1-12.
- 33 N M, MD S, B C, *et al.* Neuronal nitric oxide synthase and human vascular regulation. *Trends in cardiovascular medicine* 2009;19:256-62.
- 34 Ding Y, Vaziri N D, Coulson R, *et al.* Effects of simulated hyperglycemia, insulin, and glucagon on endothelial nitric oxide synthase expression. *American Journal of Physiology Endocrinology & Metabolism* 2000;279:E11.
- 35 Du X L, Edelstein D, , Dimmeler S, , *et al.* Hyperglycemia inhibits endothelial nitric oxide synthase activity by posttranslational modification at the Akt site. *Journal of Clinical Investigation* 2001;108:1341-48.
- 36 PK Y, YY H, CY H, *et al.* Effect of plasma glucose on infarct size in focal cerebral ischemia-reperfusion. *Neurology* 1991;41:899-905.
- 37 MJ Q, J W, NC H, *et al.* Perfusion deficit parallels exacerbation of cerebral ischemia/reperfusion injury in hyperglycemic rats. *Journal of cerebral blood flow and metabolism : official journal of the International Society of Cerebral Blood Flow and Metabolism* 1997;17:553-9.
- 38 RB D, DC B, RW B. Regional cerebral blood flow decreases during chronic and acute hyperglycemia. *Stroke* 1987;18:52-8.
- 39 C B, L S-M, J M. Increased oxidative stress during hyperglycemic cerebral ischemia. *Neurochemistry international* 2007;50:890-904.
- 40 K E, F N, R M, *et al.* Inflammatory cytokine concentrations are acutely increased by hyperglycemia in humans: role of oxidative stress. *Circulation* 2002;106:2067-72.
- 41 N K, RF K, AL B, *et al.* Hyperglycemia induces progressive changes in the cerebral microvasculature and blood-brain

- 1  
2  
3 barrier transport during focal cerebral ischemia. *Acta neurochirurgica Supplement* 1998;71:219-21.
- 4 42 H K, F Y, C N, *et al.* Influence of hyperglycemia on oxidative stress and matrix metalloproteinase-9 activation after  
5 focal cerebral ischemia/reperfusion in rats: relation to blood-brain barrier dysfunction. *Stroke* 2007;38:1044-9.
- 6 43 M P, G A, V C, *et al.* Acute hyperglycemia and early hemorrhagic transformation in ischemic stroke.  
7 *Cerebrovascular diseases (Basel, Switzerland)* 2009;28:119-23.
- 8 44 SF L, AC C, HH H, *et al.* Hyperglycemia predicts unfavorable outcomes in acute ischemic stroke patients treated with  
9 intravenous thrombolysis among a Chinese population: A prospective cohort study. *Journal of the neurological  
10 sciences* 2018;388:195-202.
- 11 45 K K, B A, A E, *et al.* Extra- and Intracellular pH in the Brain During Ischaemia, Related to Tissue Lactate Content in  
12 Normo- and Hypercapnic rats. *The European journal of neuroscience* 1992;4:166-76.
- 13 46 A S. Lactate: the ultimate cerebral oxidative energy substrate? *Journal of cerebral blood flow and metabolism :  
14 official journal of the International Society of Cerebral Blood Flow and Metabolism* 2006;26:142-52.
- 15 47 MW P, PA B, PM D, *et al.* Acute hyperglycemia adversely affects stroke outcome: a magnetic resonance imaging and  
16 spectroscopy study. *Annals of neurology* 2002;52:20-8.
- 17 48 Park H, Lee H W, Yoo J, *et al.* Body Mass Index and Prognosis in Ischemic Stroke Patients With Type 2 Diabetes  
18 Mellitus. *Front Neurol* 2019;10:563.
- 19  
20  
21  
22  
23  
24  
25  
26  
27  
28  
29  
30  
31  
32  
33  
34  
35  
36  
37  
38  
39  
40  
41  
42  
43  
44  
45  
46  
47  
48  
49  
50  
51  
52  
53  
54  
55  
56  
57  
58  
59  
60

Table 1 Baseline characteristics of patients with AIS

| Demographic characteristics                   | DM Patients  | Non-DM Patients |
|-----------------------------------------------|--------------|-----------------|
| <i>N</i>                                      | 568          | 353             |
| Age(years), median (IQR)                      | 65(55-74)    | 68(59-75)       |
| Male gender, n (%)                            | 377 (66.4%)  | 220 (62.3%)     |
| Vascular risk factors, n (%)                  |              |                 |
| Hypertension                                  | 398(70.1%)   | 209 (59.2%)     |
| Atrial fibrillation                           | 78(13.7%)    | 52 (14.7%)      |
| Hypercholesterolemia                          | 182 (32.0%)  | 128 (36.3%)     |
| Coronary heart disease                        | 75 (13.2%)   | 37 (10.5%)      |
| Previous TIA or stroke                        | 89 (15.7%)   | 51 (14.4%)      |
| Active smoking                                | 205 (36.1%)  | 130 (36.8%)     |
| Clinical findings                             |              |                 |
| BMI (kg/m <sup>2</sup> ), mean± SD            | 24.10±2.96   | 23.22±3.15      |
| Systolic blood pressure (mmHg), median (IQR)  | 148(130-166) | 139(122-156)    |
| Diastolic blood pressure (mmHg), median (IQR) | 83(75-93)    | 78(70-89)       |
| TOAST classification, n (%)                   |              |                 |
| Large-vessel occlusive                        | 177(31.2)    | 137(38.8)       |
| Small-vessel occlusive                        | 318(56.0)    | 170(48.2)       |
| Cardioembolic                                 | 56(9.9)      | 38(10.8)        |
| Other and Unknown                             | 17(3.0)      | 8(2.3)          |
| HbA1c (%), median (IQR)                       | 6.6(5.8-8.3) | -               |
| NIHSS at admission, median (IQR)              | 4(2-10)      | 5(3-11)         |
| Reperfusion therapy, n (%)                    | 32(5.6)      | 26(7.4)         |
| Unfavorable outcome at 3 months, n (%)        | 226(39.8)    | 133(37.7)       |
| Mortality at 3 months, n (%)                  | 58(10.2)     | 43(12.2)        |

AIS acute ischemic stroke; IQR interquartile range; TIA transient ischemic attack; BMI body mass index; SD standard deviation; TOAST Trial of Org 10172 in Acute Stroke Treatment; HbA1c hemoglobin A1c; NIHSS National Institutes of Health Stroke Scale.

Table 2 Univariate and multivariate logistic regression analyses for unfavorable outcome and mortality

| Parameter                                        | Univariate analysis |                      |                | Multivariate analysis |                      |                |
|--------------------------------------------------|---------------------|----------------------|----------------|-----------------------|----------------------|----------------|
|                                                  | OR                  | 95 % CI <sup>a</sup> | <i>P</i> value | OR                    | 95 % CI <sup>a</sup> | <i>P</i> value |
| <b>Predictor: Unfavorable functional outcome</b> |                     |                      |                |                       |                      |                |
| Age                                              | 1.025               | 1.011-1.039          | <0.0001        | 1.023                 | 1.001-1.046          | 0.037          |
| Male gender                                      | 0.633               | 0.445-0.902          | 0.011          | 0.715                 | 0.400-1.280          | 0.259          |
| Hypertension                                     | 0.921               | 0.639-1.328          | 0.659          |                       |                      |                |
| Atrial fibrillation                              | 2.190               | 1.350-3.552          | 0.001          | 1.985                 | 0.799-5.057          | 0.151          |
| Hypercholesterolemia                             | 0.891               | 0.620-1.279          | 0.530          |                       |                      |                |
| Coronary heart disease                           | 1.886               | 1.157-3.075          | 0.011          | 1.031                 | 0.466-2.280          | 0.940          |
| Previous TIA or stroke                           | 1.286               | 0.815-2.029          | 0.280          |                       |                      |                |
| Active Smoking                                   | 1.080               | 0.762-1.532          | 0.664          |                       |                      |                |
| BMI                                              | 0.965               | 0.912-1.022          | 0.226          |                       |                      |                |
| Systolic blood pressure                          | 1.000               | 0.994-1.007          | 0.966          |                       |                      |                |
| Diastolic blood pressure                         | 0.999               | 0.988-1.010          | 0.875          |                       |                      |                |
| Reperfusion therapy                              | 0.903               | 0.432-1.885          | 0.785          |                       |                      |                |
| NIHSS at admission                               | 1.577               | 1.464-1.700          | <0.0001        | 1.422                 | 1.308-1.545          | <0.0001        |
| Large-vessel occlusive <sup>b</sup>              | 1.120               | 0.375-3.346          | 0.839          |                       |                      |                |
| Small-vessel occlusive <sup>b</sup>              | 0.065               | 0.022-0.194          | <0.0001        | 0.237                 | 0.061-0.929          | 0.039          |
| Cardioembolic <sup>b</sup>                       | 1.250               | 0.374-4.715          | 0.717          |                       |                      |                |
| HbA1c (%)                                        | 1.111               | 1.006-1.228          | 0.038          | 0.843                 | 0.707-1.005          | 0.056          |
| Fasting blood glucose                            | 1.380               | 1.287-1.478          | <0.0001        | 1.249                 | 1.137-1.371          | <0.0001        |
| <b>Predictor: Mortality</b>                      |                     |                      |                |                       |                      |                |
| Age                                              | 1.013               | 0.991-1.035          | 0.238          |                       |                      |                |
| Male gender                                      | 0.690               | 0.396-1.201          | 0.189          |                       |                      |                |
| Hypertension                                     | 1.136               | 0.619-2.082          | 0.681          |                       |                      |                |
| Atrial fibrillation                              | 4.954               | 2.723-9.015          | <0.0001        | 2.851                 | 1.159-7.012          | 0.023          |
| Hypercholesterolemia                             | 0.867               | 0.478-1.572          | 0.638          |                       |                      |                |
| Coronary heart disease                           | 2.087               | 1.066-4.087          | 0.032          | 1.614                 | 0.669-3.896          | 0.287          |
| Previous TIA or stroke                           | 1.296               | 0.644-2.609          | 0.467          |                       |                      |                |
| Active Smoking                                   | 1.502               | 0.868-2.600          | 0.146          |                       |                      |                |
| BMI                                              | 0.956               | 0.872-1.048          | 0.337          |                       |                      |                |
| Systolic blood pressure                          | 0.992               | 0.981-1.003          | 0.135          |                       |                      |                |
| Diastolic blood pressure                         | 0.995               | 0.977-1.013          | 0.596          |                       |                      |                |
| NIHSS at admission                               | 1.209               | 1.159-1.262          | <0.0001        | 1.133                 | 1.076-1.192          | <0.0001        |
| Large-vessel occlusive                           | 0.888               | 0.274-2.882          | 0.884          |                       |                      |                |
| Reperfusion therapy                              | 1.275               | 0.431-3.773          | 0.661          |                       |                      |                |
| Small-vessel occlusive                           | 0.021               | 0.003-0.123          | <0.0001        | 0.087                 | 0.011-0.669          | 0.019          |
| Cardioembolic                                    | 1.083               | 0.303-3.870          | 0.902          |                       |                      |                |
| HbA1c (%)                                        | 1.545               | 1.335-1.787          | 0.000          | 1.486                 | 1.227-1.779          | 0.000          |
| Fasting blood glucose                            | 1.229               | 1.153-1.309          | <0.0001        | 1.096                 | 1.012-1.187          | 0.025          |

OR odds ratio; CI confidence interval; TIA transient ischemic attack; BMI body mass index; NIHSS National Institutes of Health Stroke Scale

<sup>a</sup> Note that the odds ratio corresponds to a unit increase in the explanatory variable

<sup>b</sup> Other and unknown ischemic stroke subtype as the reference

1  
2  
3 Fig. 1 Distribution of fasting blood glucose levels in non-T2DM patients and T2DM patients with AIS. All data are the median and  
4 interquartile range (IQR). Mann–Whitney *U*-test ( $Z=-9.127$ ,  $P<0.0001$ )  
5  
6  
7

8 Fig. 2. The correlation between fasting blood glucose levels and the National Institutes of Health Stroke Scale (NIHSS); Spearman's  
9 analysis ( $r=0.417$ ,  $P<0.0001$ )  
10  
11  
12

13 Fig. 3. Distribution of fasting blood glucose levels in patients with favorable and unfavorable outcomes. All data are the median and  
14 interquartile range (IQR). Mann–Whitney *U*-test ( $Z=-11.176$ ,  $P<0.0001$ )  
15  
16  
17

18 Fig. 4. Distribution of fasting blood glucose levels in survivors and non-survivors. All data are the median and interquartile range  
19 (IQR). Mann–Whitney *U*-test ( $Z=-6.851$ ,  $P<0.0001$ )  
20  
21  
22

23 Fig. 5. Kaplan–Meier survival based on fasting blood glucose (FBG) quartiles. Time-to-death was analyzed by Kaplan–Meier curves  
24 based on FBG quartiles. Patients in the lower two quartiles (FBG  $\leq 6.00$  mmol/L and  $6.00 < \text{FBG} \leq 7.37$  mmol/L) had a lower risk of  
25 mortality compared to patients with FBG levels in the higher two quartiles (FBG  $> 10.10$  mmol/L and  $7.37 < \text{FBG} \leq 10.10$  mmol/L,  
26  $P<0.0001$ ).  
27  
28  
29  
30  
31  
32  
33  
34  
35  
36  
37  
38  
39  
40  
41  
42  
43  
44  
45  
46  
47  
48  
49  
50  
51  
52  
53  
54  
55  
56  
57  
58  
59  
60



1  
2  
3  
4  
5  
6  
7  
8  
9  
10  
11  
12  
13  
14  
15  
16  
17  
18  
19  
20  
21  
22  
23  
24  
25  
26  
27  
28  
29  
30  
31  
32  
33  
34  
35  
36  
37  
38  
39  
40  
41  
42  
43  
44  
45  
46  
47  
48  
49  
50  
51  
52  
53  
54  
55  
56  
57  
58  
59  
60

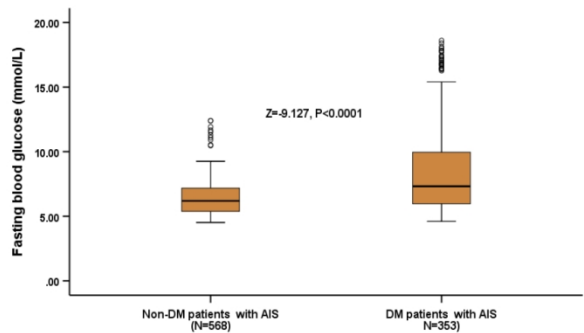

Fig. 1 Distribution of fasting blood glucose levels in non-T2DM patients and T2DM patients with AIS. All data are the median and interquartile range (IQR). Mann-Whitney U-test ( $Z=-9.127, P<0.0001$ )

Fig. 1 Distribution of fasting blood glucose levels in non-T2DM patients and T2DM patients with AIS. All data are the median and interquartile range (IQR). Mann-Whitney U-test ( $Z=-9.127, P<0.0001$ )

209x297mm (150 x 150 DPI)

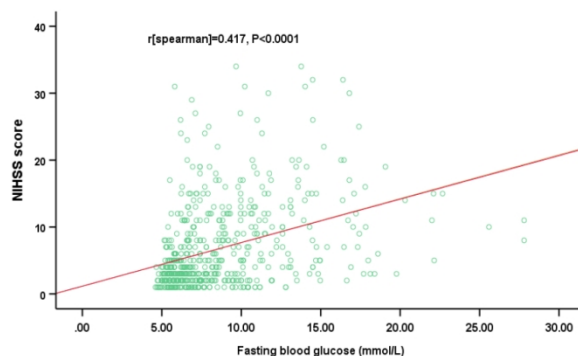

Fig. 2. The correlation between fasting blood glucose levels and the National Institutes of Health Stroke Scale (NIHSS); Spearman's analysis ( $r=0.417$ ,  $P<0.0001$ ).

Fig. 2. The correlation between fasting blood glucose levels and the National Institutes of Health Stroke Scale (NIHSS); Spearman's analysis ( $r=0.417$ ,  $P<0.0001$ )

209x297mm (150 x 150 DPI)

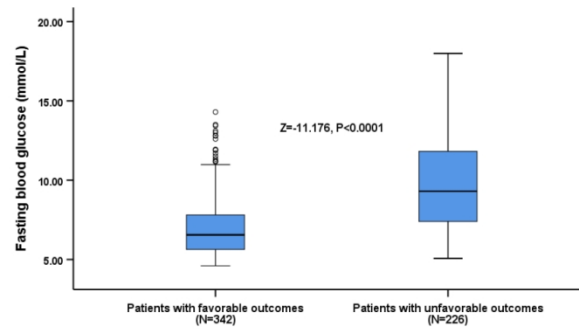

Fig 3. Distribution of fasting blood glucose levels in patients with favorable and unfavorable outcomes. All data are the median and interquartile range (IQR). Mann-Whitney *U*-test ( $Z=-11.176$ ,  $P<0.0001$ )

Fig. 3. Distribution of fasting blood glucose levels in patients with favorable and unfavorable outcomes. All data are the median and interquartile range (IQR). Mann-Whitney *U*-test ( $Z=-11.176$ ,  $P<0.0001$ )

209x297mm (150 x 150 DPI)

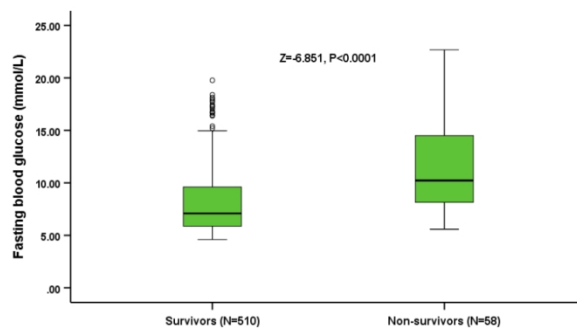

Fig. 4. Distribution of fasting blood glucose levels in survivors and non-survivors. All data are the median and interquartile range (IQR). Mann-Whitney *U*-test ( $Z=-6.851$ ,  $P<0.0001$ )

Fig. 4. Distribution of fasting blood glucose levels in survivors and non-survivors. All data are the median and interquartile range (IQR). Mann-Whitney *U*-test ( $Z=-6.851$ ,  $P<0.0001$ )

209x297mm (150 x 150 DPI)

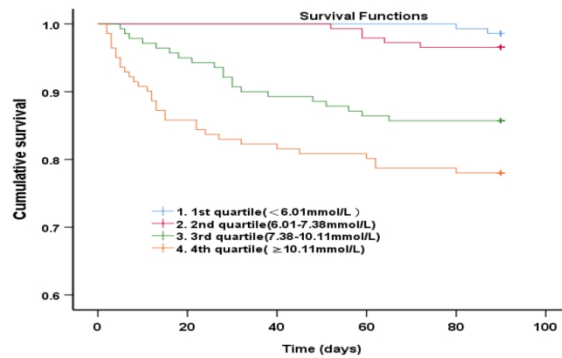

Fig. 5. Kaplan–Meier survival based on fasting blood glucose (FBG) quartiles. Time-to-death was analyzed by Kaplan–Meier curves based on FBG quartiles. Patients in the lower two quartiles (FBG  $\leq 6.00$  mmol/L and  $6.00 < \text{FBG} \leq 7.37$  mmol/L) had a lower risk of mortality compared to patients with FBG levels in the higher two quartiles (FBG  $> 10.10$  mmol/L and  $7.37 < \text{FBG} \leq 10.10$  mmol/L,  $P < 0.0001$ ).

Fig. 5. Kaplan–Meier survival based on fasting blood glucose (FBG) quartiles. Time-to-death was analyzed by Kaplan–Meier curves based on FBG quartiles. Patients in the lower two quartiles (FBG  $\leq 6.00$  mmol/L and  $6.00 < \text{FBG} \leq 7.37$  mmol/L) had a lower risk of mortality compared to patients with FBG levels in the higher two quartiles (FBG  $> 10.10$  mmol/L and  $7.37 < \text{FBG} \leq 10.10$  mmol/L,  $P < 0.0001$ ).

209x297mm (150 x 150 DPI)

STROBE Statement—Checklist of items that should be included in reports of *cohort studies*

|                              | Item No | Recommendation                                                                                                                                                                                                                                                                                                         | Page No     |
|------------------------------|---------|------------------------------------------------------------------------------------------------------------------------------------------------------------------------------------------------------------------------------------------------------------------------------------------------------------------------|-------------|
| <b>Title and abstract</b>    | 1       | (a) Indicate the study's design with a commonly used term in the title or the abstract<br>(b) Provide in the abstract an informative and balanced summary of what was done and what was found                                                                                                                          | 1, 2<br>2   |
| <b>Introduction</b>          |         |                                                                                                                                                                                                                                                                                                                        |             |
| Background/rationale         | 2       | Explain the scientific background and rationale for the investigation being reported                                                                                                                                                                                                                                   | 3           |
| Objectives                   | 3       | State specific objectives, including any prespecified hypotheses                                                                                                                                                                                                                                                       | 3           |
| <b>Methods</b>               |         |                                                                                                                                                                                                                                                                                                                        |             |
| Study design                 | 4       | Present key elements of study design early in the paper                                                                                                                                                                                                                                                                | 3           |
| Setting                      | 5       | Describe the setting, locations, and relevant dates, including periods of recruitment, exposure, follow-up, and data collection                                                                                                                                                                                        | 3           |
| Participants                 | 6       | (a) Give the eligibility criteria, and the sources and methods of selection of participants. Describe methods of follow-up<br>(b) For matched studies, give matching criteria and number of exposed and unexposed                                                                                                      | 3<br>3      |
| Variables                    | 7       | Clearly define all outcomes, exposures, predictors, potential confounders, and effect modifiers. Give diagnostic criteria, if applicable                                                                                                                                                                               | 3, 4        |
| Data sources/<br>measurement | 8*      | For each variable of interest, give sources of data and details of methods of assessment (measurement). Describe comparability of assessment methods if there is more than one group                                                                                                                                   | 4           |
| Bias                         | 9       | Describe any efforts to address potential sources of bias                                                                                                                                                                                                                                                              |             |
| Study size                   | 10      | Explain how the study size was arrived at                                                                                                                                                                                                                                                                              | 3           |
| Quantitative variables       | 11      | Explain how quantitative variables were handled in the analyses. If applicable, describe which groupings were chosen and why                                                                                                                                                                                           | 3           |
| Statistical methods          | 12      | (a) Describe all statistical methods, including those used to control for confounding<br>(b) Describe any methods used to examine subgroups and interactions<br>(c) Explain how missing data were addressed<br>(d) If applicable, explain how loss to follow-up was addressed<br>(e) Describe any sensitivity analyses | 4<br>4      |
| <b>Results</b>               |         |                                                                                                                                                                                                                                                                                                                        |             |
| Participants                 | 13*     | (a) Report numbers of individuals at each stage of study—eg numbers potentially eligible, examined for eligibility, confirmed eligible, included in the study, completing follow-up, and analysed<br>(b) Give reasons for non-participation at each stage<br>(c) Consider use of a flow diagram                        | 4           |
| Descriptive data             | 14*     | (a) Give characteristics of study participants (eg demographic, clinical, social) and information on exposures and potential confounders<br>(b) Indicate number of participants with missing data for each variable of interest<br>(c) Summarise follow-up time (eg, average and total amount)                         | 4<br>4<br>4 |
| Outcome data                 | 15*     | Report numbers of outcome events or summary measures over time                                                                                                                                                                                                                                                         | 4, 5        |

|    |                          |    |                                                                                                                                                                                                              |   |
|----|--------------------------|----|--------------------------------------------------------------------------------------------------------------------------------------------------------------------------------------------------------------|---|
| 1  | Main results             | 16 | (a) Give unadjusted estimates and, if applicable, confounder-adjusted estimates and their precision (eg, 95% confidence interval). Make clear which confounders were adjusted for and why they were included | 5 |
| 2  |                          |    | (b) Report category boundaries when continuous variables were categorized                                                                                                                                    | 5 |
| 3  |                          |    | (c) If relevant, consider translating estimates of relative risk into absolute risk for a meaningful time period                                                                                             | 5 |
| 4  |                          |    |                                                                                                                                                                                                              |   |
| 5  |                          |    |                                                                                                                                                                                                              |   |
| 6  |                          |    |                                                                                                                                                                                                              |   |
| 7  |                          |    |                                                                                                                                                                                                              |   |
| 8  |                          |    |                                                                                                                                                                                                              |   |
| 9  | Other analyses           | 17 | Report other analyses done—eg analyses of subgroups and interactions, and sensitivity analyses                                                                                                               | 5 |
| 10 |                          |    |                                                                                                                                                                                                              |   |
| 11 | <b>Discussion</b>        |    |                                                                                                                                                                                                              |   |
| 12 |                          |    |                                                                                                                                                                                                              |   |
| 13 | Key results              | 18 | Summarise key results with reference to study objectives                                                                                                                                                     | 6 |
| 14 | Limitations              | 19 | Discuss limitations of the study, taking into account sources of potential bias or imprecision. Discuss both direction and magnitude of any potential bias                                                   | 6 |
| 15 |                          |    |                                                                                                                                                                                                              |   |
| 16 | Interpretation           | 20 | Give a cautious overall interpretation of results considering objectives, limitations, multiplicity of analyses, results from similar studies, and other relevant evidence                                   | 6 |
| 17 |                          |    |                                                                                                                                                                                                              |   |
| 18 |                          |    |                                                                                                                                                                                                              |   |
| 19 | Generalisability         | 21 | Discuss the generalisability (external validity) of the study results                                                                                                                                        | 6 |
| 20 |                          |    |                                                                                                                                                                                                              |   |
| 21 | <b>Other information</b> |    |                                                                                                                                                                                                              |   |
| 22 | Funding                  | 22 | Give the source of funding and the role of the funders for the present study and, if applicable, for the original study on which the present article is based                                                | 7 |
| 23 |                          |    |                                                                                                                                                                                                              |   |
| 24 |                          |    |                                                                                                                                                                                                              |   |

\*Give information separately for exposed and unexposed groups.

**Note:** An Explanation and Elaboration article discusses each checklist item and gives methodological background and published examples of transparent reporting. The STROBE checklist is best used in conjunction with this article (freely available on the Web sites of PLoS Medicine at <http://www.plosmedicine.org/>, Annals of Internal Medicine at <http://www.annals.org/>, and Epidemiology at <http://www.epidem.com/>). Information on the STROBE Initiative is available at <http://www.strobe-statement.org>.

# BMJ Open

## Association between fasting blood glucose and outcomes and mortality in acute ischemic stroke patients with diabetes mellitus: a retrospective observational study in Wuhan, China

|                                 |                                                                                                                                                                                                                                                                                                                                                                                                                                                                                                                            |
|---------------------------------|----------------------------------------------------------------------------------------------------------------------------------------------------------------------------------------------------------------------------------------------------------------------------------------------------------------------------------------------------------------------------------------------------------------------------------------------------------------------------------------------------------------------------|
| Journal:                        | <i>BMJ Open</i>                                                                                                                                                                                                                                                                                                                                                                                                                                                                                                            |
| Manuscript ID                   | bmjopen-2020-037291.R1                                                                                                                                                                                                                                                                                                                                                                                                                                                                                                     |
| Article Type:                   | Original research                                                                                                                                                                                                                                                                                                                                                                                                                                                                                                          |
| Date Submitted by the Author:   | 23-Mar-2020                                                                                                                                                                                                                                                                                                                                                                                                                                                                                                                |
| Complete List of Authors:       | Yao, Tao; Wuhan University Renmin Hospital, Department of Neurology<br>Zhan, Yanqiang; Wuhan University Renmin Hospital, Department of Neurology<br>Shen, Jing ; Wuhan University Renmin Hospital, Department of Neurology<br>Xu, Lu ; Wuhan University Renmin Hospital, Department of Neurology<br>Peng, Bo ; Wuhan University Renmin Hospital, Department of Neurology<br>Cui, Qin; Wuhan University Renmin Hospital, Department of Neurology<br>Liu, Zhichao; Wuhan University Renmin Hospital, Department of Neurology |
| <b>Primary Subject Heading</b>: | Neurology                                                                                                                                                                                                                                                                                                                                                                                                                                                                                                                  |
| Secondary Subject Heading:      | Intensive care, Diabetes and endocrinology, Emergency medicine, Global health                                                                                                                                                                                                                                                                                                                                                                                                                                              |
| Keywords:                       | NEUROLOGY, Stroke < NEUROLOGY, Neuropathology < NEUROLOGY, Diabetic neuropathy < DIABETES & ENDOCRINOLOGY                                                                                                                                                                                                                                                                                                                                                                                                                  |
|                                 |                                                                                                                                                                                                                                                                                                                                                                                                                                                                                                                            |

SCHOLARONE™  
Manuscripts





I, the Submitting Author has the right to grant and does grant on behalf of all authors of the Work (as defined in the below author licence), an exclusive licence and/or a non-exclusive licence for contributions from authors who are: i) UK Crown employees; ii) where BMJ has agreed a CC-BY licence shall apply, and/or iii) in accordance with the terms applicable for US Federal Government officers or employees acting as part of their official duties; on a worldwide, perpetual, irrevocable, royalty-free basis to BMJ Publishing Group Ltd ("BMJ") its licensees and where the relevant Journal is co-owned by BMJ to the co-owners of the Journal, to publish the Work in this journal and any other BMJ products and to exploit all rights, as set out in our [licence](#).

The Submitting Author accepts and understands that any supply made under these terms is made by BMJ to the Submitting Author unless you are acting as an employee on behalf of your employer or a postgraduate student of an affiliated institution which is paying any applicable article publishing charge ("APC") for Open Access articles. Where the Submitting Author wishes to make the Work available on an Open Access basis (and intends to pay the relevant APC), the terms of reuse of such Open Access shall be governed by a Creative Commons licence – details of these licences and which [Creative Commons](#) licence will apply to this Work are set out in our licence referred to above.

Other than as permitted in any relevant BMJ Author's Self Archiving Policies, I confirm this Work has not been accepted for publication elsewhere, is not being considered for publication elsewhere and does not duplicate material already published. I confirm all authors consent to publication of this Work and authorise the granting of this licence.

1  
2  
3  
4  
5  
6  
7 **Association between fasting blood glucose and outcomes and mortality**  
8  
9 **in acute ischemic stroke patients with diabetes mellitus: a retrospective**  
10 **observational study in Wuhan, China**  
11  
12  
13  
14  
15  
16  
17

18 **Full names for all authors:**

19  
20 **Tao Yao, Yan-Qiang Zhan, Jing Shen, Lu Xu, Bo Peng, Qin Cui, Zhi-Chao Liu\***  
21  
22

23  
24 **Institutional addresses for all authors:**

25 Department of Neurology, Wuhan University, Renmin Hospital, Wuhan, 430060, Hubei Province,  
26 P.R.C.  
27  
28  
29

30  
31  
32 **Email addresses for all authors:**

33 Tao Yao: yaotao@whu.edu.cn; <https://orcid.org/0000-0001-8450-7201>

34 Yan-Qiang Zhan: zhanyq77@163.com; <https://orcid.org/0000-0001-7265-7368>

35 Jing Shen: 81642309@qq.com

36 Lu Xu: 1171505714@qq.com

37 Bo Peng: pengbo\_whu@hotmail.com

38 Qin Cui: cuiqin2468@163.com; <https://orcid.org/0000-0002-8165-246X>

39 Zhi-Chao Liu: zhichao.liu@whu.edu.cn; <https://orcid.org/0000-0001-9548-7883>  
40  
41  
42  
43

44 **Corresponding author:**

45  
46 **Zhi-Chao Liu** Email: zhichao.liu@whu.edu.cn; Tel:86 13986160231  
47  
48  
49  
50  
51  
52  
53  
54  
55  
56  
57  
58  
59  
60

## ABSTRACT

**Objective** To evaluate the predictive value of fasting blood glucose (FBG) on unfavorable outcomes and mortality in diabetes mellitus (DM) patients after acute ischemic stroke (AIS).

**Study design** A population-based, retrospective observational study was conducted. Clinical data were routinely collected, including sex, age, BMI, vascular risk factors, and systolic/diastolic blood pressure. National Institute of Health Stroke Scale (NIHSS) score was used to assess stroke severity on admission. FBG was determined on the first day after fasting for at least 8 hours. The modified Rankin Scale (mRS) was used to assess functional outcome at 90 days: 3-6, unfavorable outcome; 6, death.

**Setting** Renmin Hospital of Wuhan University, Wuhan, China.

**Participants** AIS patients with DM who were consecutively admitted within 24 hours of onset from January 2018 to June 2019.

**Results** For the 568 patients, the median age was 65 years [interquartile range (IQR), 55-74]. There were 377 (66.4%) men. The median FBG values were 7.37 mmol/L (IQR, 5.99-10.10 mmol/L), and the median glycosylated hemoglobin (HbA1c) values were 6.6 (IQR, 5.8-8.3). Multivariable logistic regression analysis of confounding factors showed that FBG at the time of admission was an independent predictor of unfavorable outcome [odds ratio (OR), 1.25 (1.14-1.37);  $P < 0.0001$ ] and mortality [OR, 1.096 (1.01-1.19);  $P < 0.05$ ] at 90 days after onset. Time to death was analyzed by Kaplan–Meier curves based on FBG quartiles. The risk of death in the two highest quartile groups (FBG, 7.38-10.10 mmol/L; FBG,  $\geq 10.11$  mmol/L) was significantly higher than that in the two lowest quartile groups (FBG,  $\leq 6.00$  mmol/L; FBG, 6.01-7.37 mmol/L) ( $P < 0.0001$ ).

**Conclusions** Higher FBG levels are associated with unfavorable outcomes and mortality in Chinese AIS patients with DM. Our data contribute to the knowledge regarding the relationship between FBG and outcome in AIS with DM.

### Strengths and limitations of this study

- This study evaluated the predictive value of FBG at admission with regard to short-term outcome. Previous studies focusing on this evaluation are rare.
- Complete follow-up was achieved in this study.
- The study used routinely collected clinical data and practical statistical methods to correct the effects of confounding factors.
- This study was conducted in a single center with a limited sample size.
- Data of random blood glucose as a possible meaningful predictor were not fully available in this retrospective study.

## INTRODUCTION

Diabetes mellitus (DM) is recognized as an important risk factor for ischemic stroke.<sup>1 2</sup> Previous epidemiologic investigations have confirmed that patients with DM have a high disability rate and a high risk of in-hospital death after an acute ischemic stroke (AIS).<sup>3 4</sup> A recent study involving a Chinese population included 10,331 patients with DM who were confirmed to have an AIS showed a high risk for in-hospital death.<sup>5</sup> Indeed, assessment of functional outcome and mortality risk among AIS patients with diabetes is a common concern for both patients and clinicians.

Hyperglycemia is common in AIS patients with and without DM.<sup>6</sup> Many studies have shown that hyperglycemia at the time of admission is associated with AIS infarct volume.<sup>7</sup> This condition can also predict functional outcome and risk of death.<sup>8-10</sup> However, few studies have focused on DM patients with hyperglycemia at the time of admission. Studies have shown that high blood glucose levels in DM patients have no significant predictive value for functional outcomes and risk of death.<sup>11</sup> Moreover, two recent studies have confirmed that high blood glucose levels are predictive of functional outcomes in diabetic and non-diabetic patients complicated by cerebral infarction.<sup>12 13</sup> Therefore, the correlation between blood glucose levels and functional outcomes in DM patients should be defined so that clinicians can provide accurate prognosis and eventually develop glycemic control strategies after an ischemic stroke.

Because fasting blood glucose (FBG) can minimize the effects of diet,<sup>14</sup> the FBG level is considered a more reliable blood glucose level detection tool than random blood glucose levels.<sup>15</sup> Compared to random blood glucose levels, FBG level provides a stronger predictor of functional outcomes.<sup>16 17</sup>

Hence, this study aimed to investigate the predictive value of FBG on functional outcomes and mortality in Chinese AIS patients with DM.

## METHODS

### Patients and Study Design

This retrospective observational study collected information involving AIS patients with DM who were admitted to the Department of Neurology of the Renmin Hospital of Wuhan University from January 2018 to June 2019. The diagnostic criteria for acute cerebral infarction are in accordance with World Health Organization standards.<sup>18</sup> Patients with DM were defined as patients with a history of DM before admission according to their medical records or those who received drugs or insulin for hypoglycemic treatment after admission. Patients must meet the following criteria: onset was within 24 h; age  $\geq$  18 years; and, in the case of a recurrent cerebral infarction, a modified Rankin Scale (mRS)  $\leq$  2.<sup>19</sup> Patients with psychoses, severe bone joint diseases, and other neurologic diseases that affect functional outcomes were excluded from the study.

The study was approved by the Ethics Committee of the Renmin Hospital of Wuhan University. Signed informed consent was obtained for all patients participating in the study.

### Clinical Variables and Neuroimaging

All patients completed diagnostic testing after admission, including routine serologic testing, neuroimaging, intracranial and extravascular studies, and a cardiac examination. Clinical data were routinely collected at the time of admission, included gender, age, BMI, notation of vascular risk factors (including hypertension, DM, coronary heart disease, atrial fibrillation, hypercholesterolemia,

1  
2  
3 stroke history, and smoking history), and systolic/diastolic blood pressure. The severity of stroke at  
4 the time of admission was assessed using the National Institutes of Health Stroke Scale (NIHSS).<sup>20</sup>  
5 Reperfusion therapy included IV thrombolysis with rtPA and endovascular therapy with intra-arterial  
6 thrombolysis or mechanical thrombectomy. The causes of stroke were grouped according to the Trial  
7 of Org 10172 in Acute Stroke Treatment (TOAST),<sup>21</sup> as follows: large-vessel occlusive; small-vessel  
8 occlusive; cardioembolic; and other and unknown. Patients underwent a CT scan and/or  
9 MRI examination within 24-48 h after admission. The diagnosis of cerebral infarction was based on  
10 these images.  
11  
12  
13

### 14 15 **End Points and Follow-up**

16 The mRS score at 90 days was used as an indicator of functional outcomes, as follows:  $\leq 2$ , good  
17 outcome; 3-6, unfavorable outcome; and 6, death. Two specially trained neurologic nurses were  
18 responsible for assessing functional outcomes of AIS patients by calling patients or their family  
19 members once a month.  
20  
21  
22

### 23 24 **Laboratory Testing**

25 To minimize the impact of diet on the blood glucose level, FBG levels were used as a reliable  
26 glycemic index. Blood samples were collected at approximately 7:30 am on the first day after  
27 admission after fasting for at least 8 hours. Glycosylated hemoglobin (HbA1c) was tested using  
28 standard test methods.  
29  
30

### 31 32 **Statistical Analysis**

33 Data following normal distribution were described using the mean  $\pm$  standard deviation. Data  
34 following a non-normal distribution were described using the median (quartiles). Categorical  
35 variables were described using a percentage. The Mann–Whitney U test was used to compare the  
36 non-normal distribution between two groups. The relationship between two continuous variables  
37 was analyzed by the Spearman correlation. We used univariable logistic regression to analyze the  
38 relationship between gender, age, BMI, vascular risk factors, systolic/diastolic blood pressure,  
39 NIHSS score, stroke TOAST classification, HbA1c, the FBG level, and outcomes of acute cerebral  
40 infarction at 90 days and death. Factors giving a  $P < 0.1$  were re-analyzed using multivariable  
41 regression analysis to determine the correlation between the FBG level and functional outcomes of  
42 cerebral infarction, as well as death. The results are expressed by ORs and 95% CIs. Moreover,  
43 we performed quartiles based on FBG levels as follows: quartile 1 (FBG  $\leq 6.00$  mmol/L); quartile 2  
44 (FBG, 6.01-7.37 mmol/L); quartile 3 (FBG, 7.38-10.10 mmol/L); and quartile 4 (FBG  $\geq 10.11$   
45 mmol/L). Kaplan–Meier survival curves were used to analyze the value of the FBG level for  
46 predicting death. SPSS (version 25.0; SPSS, Inc., Chicago, IL, USA) was used for statistical  
47 analysis. A  $P < 0.05$  indicates a significant difference.  
48  
49  
50  
51  
52  
53

### 54 55 **Patient and public involvement**

56 No patients were involved with design, data provision, analysis, or publication of the study.  
57  
58  
59  
60

## RESULTS

### Baseline Characteristics of the Study Population

A total of 568 AIS patients with DM, including 377 males and 191 females, were enrolled in this study and all were followed up. The median age of the patients was 65 years (IQR, 55-74 years), and the mean BMI was  $24.10 \pm 2.96$  kg/m<sup>2</sup>. The median NIHSS score at the time of admission was 4 (IQR, 2-10). A total of 32 of 568 AIS patients received reperfusion therapy, including 28 patients with IV rtPA thrombolysis and 7 patients with endovascular treatment. A total of 226 patients (39.8%) had unfavorable outcomes, including 58 deaths (10.2%). Of the 58 deaths in this study, 36 (62.1%) died of increased intracranial pressure; 10 (17.2%) died of cardiac diseases such as heart failure, myocardial infarction, or arrhythmia; and 12 (20.7%) died of other causes such as severe pneumonia, stress ulcer bleeding, or pulmonary embolism. Moreover, 14 (24.1%) had symptomatic intracerebral hemorrhages. The baseline data of all patients at the time of admission are shown in Table 1.

### Main Results

The median FBG values were 7.37 mmol/L (IQR, 5.99-10.10 mmol /L). The NIHSS scores of AIS patients with DM at the time of admission increased with elevation of the FBG levels. A moderately significant positive correlation was found between the NIHSS score and the FBG level ( $r = 0.417$ ,  $P < 0.0001$ ). The results are shown in Figure 1. The results also showed that FBG levels had no significant correlation with other risk factors, including smoking, hypertension, coronary heart disease, hypercholesterolemia history, or a history of stroke ( $P > 0.05$ ).

### FBG level and functional outcome at 90 days

FBG levels of 226 patients with unfavorable functional outcomes at 90 days [9.64 mmol/L (IQR, 7.40-12.60 mmol /L)] were significantly higher than patients with favorable functional outcomes vs. [6.56 mmol/L (IQR, 5.64-7.86 mmol /L);  $Z = -11.176$ ;  $P < 0.0001$ ; Figure 2]. Univariable regression analysis showed that unfavorable functional outcomes were significantly correlated with age, male gender, atrial fibrillation, coronary heart disease, NIHSSNIHSS score, small-vessel occlusion, HbA1c, and FBG level ( $P < 0.05$ ). Multivariable logistic regression analysis was performed on outcome-indicating factors. The results showed that age (OR, 1.02; 95%CI, 1.00-1.05;  $P = 0.037$ ), NIHSSNIHSS score (OR, 1.42; 95%CI, 1.31-1.55;  $P < 0.0001$ ), small-vessel occlusion (OR, 0.24; 95%CI, 0.06-0.93;  $P = 0.039$ ), and FBG level (OR, 1.25; 95%CI, 1.14-1.37;  $P < 0.0001$ ) were independent predictive factors of functional outcome for AIS patients with DM (Table 2).

### FBG levels and mortality at 90 days

The FBG levels of 58 nonsurviving patients at 90 days were significantly higher than surviving patients [10.41 mmol/L (IQR, 8.14-15.29 mmol /L vs. 7.10 mmol/L (IQR, 5.88-9.65 mmol /L);  $Z = -6.851$ ,  $P < 0.0001$ ; Figure 3]. Univariable regression analysis of nonsurviving patients showed that atrial fibrillation, coronary heart disease, NIHSS score, small-vessel occlusive disease, HbA1c, and FBG level were significantly associated with death ( $P < 0.05$ ). Multivariable logistic regression analysis was performed on functional-outcome-indicating factors and the results showed that atrial fibrillation (OR, 2.85; 95%CI, 1.16-7.01;  $P = 0.023$ ), NIHSS score (OR, 1.13; 95%CI, 1.08-1.19;  $P < 0.0001$ ), small-vessel occlusive ((OR, 0.087; 95%CI, 0.01-0.67;  $P = 0.019$ ), HbA1c ((OR, 1.49;

95%CI, 1.23-1.78;  $P < 0.0001$ ), and FBG levels ((OR, 1.10; 95%CI, 1.01-1.19;  $P=0.025$ ; Table 2) were independent predictive factors of death for AIS patients with DM.

We used Kaplan-Meier curves to compare the quartiles of FBG levels and time to death after admission. The results showed that the risk of death in the two highest quartile groups (FBG, 7.38-10.10 mmol/L; and FBG,  $\geq 10.11$  mmol/L) was significantly higher than the two lowest quartile groups (FBG,  $\leq 6.00$  mmol/L; and FBG, 6.01-7.37 mmol/L;  $P < 0.0001$ ; Figure 4).

## DISCUSSION

In this retrospective study, we found that higher fasting blood glucose levels are associated with unfavorable outcomes and mortality in Chinese AIS patients with DM. Moreover, higher FBG was associated with higher NIHSS score on admission.

Acute stroke may be accompanied by neuroendocrine disorders and inflammation, resulting in an acute blood glucose elevation.<sup>22</sup> Previous studies focusing on acute blood glucose elevations generally used fasting or random blood glucose levels at the time of admission as an indicator of acute blood glucose. A meta-analysis involving 32 studies showed that acute stroke patients often had high blood glucose levels, and the proportion of high blood glucose levels in acute stroke patients with and without DM reached 8%-63% and 39%-83%, respectively.<sup>6</sup> A number of studies have shown that high blood glucose levels at the time of admission are closely related to the functional outcome of patients with AIS.<sup>9 10 23 24</sup> Masrur et al.<sup>9</sup> studied 1408 AIS patients who received intravenous thrombolysis and showed that high blood glucose levels at the time of admission increased the risk of unfavorable functional outcomes and death. Snarska et al.<sup>10</sup> and Zhao et al.<sup>25</sup> reported that a high blood glucose level in AIS patients at the time of admission was significantly associated with an unfavorable functional outcome and risk of in-hospital death. Moreover, several previous studies involving AIS patients without DM showed that high blood glucose levels were also closely related to unfavorable functional outcomes and risk of death.<sup>24</sup>

Because the focus of previous studies was on AIS patients only or AIS patients without DM, acute blood glucose levels at the time of admission among AIS patients with DM were not adequately addressed; thus, the predictive value for unfavorable functional outcomes or mortality has not been established.<sup>12 13 26-28</sup> Yao et al.<sup>24</sup> and Hu et al.<sup>28</sup> showed that in AIS patients without DM, high FBG levels predicted unfavorable functional outcomes and death; however, similar levels for AIS patients with DM had an insignificant predictive value. Tsuga et al.<sup>12</sup> and Sung et al.<sup>13</sup> performed subgroup analysis on AIS patients with and without DM and showed that acute blood glucose levels in both groups had predictive power for functional outcomes. Recently, a meta-analysis incorporated 13 studies and showed no statistical difference existed in prognostic indicators between AIS patients with and without DM.<sup>29</sup> In this study, we used baseline FBG levels at the time of admission as a marker for the acute blood glucose level. The results revealed additional evidence for the predictive value of high acute blood glucose levels on functional outcomes and high risk of death in AIS patients with DM.

The mechanism underlying the predictive value of high blood glucose levels at the time of admission on functional outcome and mortality is not fully understood; however, the correlation between a high blood glucose level after AIS and the severity of stroke and unfavorable functional outcomes may be summarized as follows. First, a high blood glucose level can affect the balance

1  
2  
3 between the coagulation and fibrinolytic systems, resulting in impaired recanalization.<sup>30 31</sup> Second, a  
4 high blood glucose level may affect endothelium-derived nitric-oxide-mediated vasodilation, thereby  
5 reducing intracranial blood flow and reperfusion at the infarct site.<sup>32 33</sup> In vitro studies have shown  
6 that nitric oxide synthase 3 gene expression and nitric oxide production are reduced  
7 in hyperglycemic conditions.<sup>34 35</sup> Clinical studies have shown that cerebral infarction tissue  
8 reperfusion is decreased and infarct volume is increased in patients with high blood glucose  
9 levels.<sup>36-38</sup> Third, a high blood glucose level may generate oxidative stress, leading to  
10 neuroendocrine disorders and inflammatory reactions,<sup>39 40</sup> blood-brain barrier disruption,<sup>41</sup> and  
11 eventually reperfusion injury.<sup>37 42</sup> Two clinical studies have shown that ischemic stroke patients with  
12 acute high blood glucose levels are at increased risk for hemorrhagic transformation,<sup>43</sup> and cerebral  
13 hemorrhage in patients with thrombolysis leads to unfavorable functional outcomes.<sup>44</sup> High blood  
14 glucose levels may increase the risk of vascular reperfusion injury. Fourth, patients with DM  
15 generally have insufficient insulin secretion or insulin resistance; therefore, anaerobic glycolysis may  
16 increase in patients with high blood glucose levels,<sup>45 46</sup> resulting in brain tissue lactic acid  
17 accumulation and internal environment disorders that aggravate brain tissue damage.<sup>47</sup> All of these  
18 pathologic changes together cause severe stroke and secondary functional outcomes and death.

### 25 **Strengths and limitations**

26 This study had the following highlights. First, quite a few studies have evaluated the association  
27 between blood glucose level and outcomes of AIS patients without DM; however, to the best of our  
28 knowledge, no studies have evaluated these conditions in patients with DM<sup>24 26</sup>. Furthermore,  
29 complete follow-up of all patients was achieved in this study. Third, this study used routinely  
30 collected clinical data such as gender, age, BMI, vascular risk factors, NIHSS score,  
31 systolic/diastolic blood pressure, and reperfusion therapy. Also, practical statistical methods were  
32 used to correct the effects of confounding factors.

33 This study also had limitations. First, a single center was used and sample size was  
34 limited. Second, data of random blood glucose as a possible meaningful predictor were not fully  
35 available in this retrospective study. Therefore, we cannot investigate the predictive value of random  
36 blood glucose compared with FBG.

### 42 **CONCLUSIONS**

43 In conclusion, higher fasting blood glucose levels are associated with unfavorable outcomes and  
44 mortality in Chinese AIS patients with DM. Our data contribute to the knowledge for clinicians  
45 about the relation between FBG and outcome in AIS with DM.  
46  
47  
48  
49  
50  
51  
52  
53  
54  
55  
56  
57  
58  
59  
60



1  
2  
3  
4  
5  
6  
7  
8  
9  
10  
11 **Author affiliations** Department of Neurology, Wuhan University, Renmin Hospital, Wuhan,  
12 430060, Hubei Province, P.R.C.  
13

14  
15 **Acknowledgments** The authors would like to acknowledge all the study participants. We would like  
16 to thank Editage (www.editage.com) for English language editing.  
17

18  
19 **Contributors** TY analyzed and interpreted the results and wrote this manuscript text. TY, YQZ, JS,  
20 BP, LX, and QC had full access to all of the data in the study and take responsibility for the integrity  
21 of the data and the accuracy of the data analysis. YT, YQZ, and ZCL designed the study. All authors  
22 reviewed and approved the manuscript.  
23

24  
25 **Funding** This work was supported by the Guide Foundation of Wuhan University  
26 (RMYD2018M09).  
27

28  
29 **Disclaimer** The funders had no role in the study design, data collection, analysis, interpretation or  
30 decision to submit the manuscript for publication.  
31

32  
33 **Competing interests** None declared.  
34

35  
36 **Patient consent for publication** Not required.  
37

38  
39 **Ethics approval** This study is approved by the Ethics Committee of Wuhan University Renmin  
40 hospital(No. WDRY2017-K038).  
41

42  
43 **Provenance and peer review** Not commissioned; externally peer reviewed.  
44

45  
46 **Data availability statement** Data are available upon reasonable request from corresponding  
47 author.  
48  
49  
50  
51  
52  
53  
54  
55  
56  
57  
58  
59  
60

## References

- 1 Cui R, Iso H, Yamagishi K, *et al.* Diabetes mellitus and risk of stroke and its subtypes among Japanese: the Japan public health center study. *Stroke* 2011;42:2611-4.
- 2 O'Donnell M J, Chin S L, Rangarajan S, *et al.* Global and regional effects of potentially modifiable risk factors associated with acute stroke in 32 countries (INTERSTROKE): a case-control study. *Lancet* 2016;388:761-75.
- 3 Andersen K K, Olsen T S. One-month to 10-year survival in the Copenhagen stroke study: interactions between stroke severity and other prognostic indicators. *J Stroke Cerebrovasc Dis* 2011;20:117-23.
- 4 Reeves M J, Vaidya R S, Fonarow G C, *et al.* Quality of care and outcomes in patients with diabetes hospitalized with ischemic stroke: findings from Get With the Guidelines-Stroke. *Stroke* 2010;41:e409-17.
- 5 Si Y, Xiao X, Xiang S, *et al.* Mortality-specific comorbidity among inpatients with ischemic stroke in West China. *Acta Neurol Scand* 2019.
- 6 Capes S E, Hunt D, Malmberg K, *et al.* Stress hyperglycemia and prognosis of stroke in nondiabetic and diabetic patients: a systematic overview. *Stroke* 2001;32:2426-32.
- 7 Baird T A, Parsons M W, Phan T, *et al.* Persistent poststroke hyperglycemia is independently associated with infarct expansion and worse clinical outcome. *Stroke* 2003;34:2208-14.
- 8 Powers W J, Rabinstein A A, Ackerson T, *et al.* 2018 Guidelines for the Early Management of Patients With Acute Ischemic Stroke: A Guideline for Healthcare Professionals From the American Heart Association/American Stroke Association. *Stroke* 2018;49:e46-e110.
- 9 Masrur S, Cox M, Bhatt D L, *et al.* Association of Acute and Chronic Hyperglycemia With Acute Ischemic Stroke Outcomes Post-Thrombolysis: Findings From Get With The Guidelines-Stroke. *J Am Heart Assoc* 2015;4:e002193.
- 10 Snarska K K, Bachorzewska-Gajewska H, Kapica-Topczewska K, *et al.* Hyperglycemia and diabetes have different impacts on outcome of ischemic and hemorrhagic stroke. *Arch Med Sci* 2017;13:100-08.
- 11 Xue W-Y, Xu Y-C, Wu Y-W, *et al.* Observation of elevated fasting blood glucose and functional outcome after ischemic stroke in patients with and without diabetes. *Oncotarget* 2017;8.
- 12 Zsuga J, Gesztelyi R, Kemeny-Beke A, *et al.* Different effect of hyperglycemia on stroke outcome in non-diabetic and diabetic patients — a cohort study. *Neurological Research* 2012;34:72-79.
- 13 Sung J Y, Chen C I, Hsieh Y C, *et al.* Comparison of admission random glucose, fasting glucose, and glycated hemoglobin in predicting the neurological outcome of acute ischemic stroke: a retrospective study. *PeerJ* 2017;5:e2948.
- 14 Moebus S, Gores L, Losch C, *et al.* Impact of time since last caloric intake on blood glucose levels. *Eur J Epidemiol* 2011;26:719-28.
- 15 Standards of medical care in diabetes--2014. *Diabetes Care* 2014;37 Suppl 1:S14-80.
- 16 Osei E, Fonville S, Zandbergen A A M, *et al.* Impaired fasting glucose is associated with unfavorable outcome in ischemic stroke patients treated with intravenous alteplase. *J Neurol*

2018;265:1426-31.

17 Cao W, Ling Y, Wu F, *et al.* Higher fasting glucose next day after intravenous thrombolysis is independently associated with poor outcome in acute ischemic stroke. *J Stroke Cerebrovasc Dis* 2015;24:100-3.

18 Hatano S. Experience from a multicentre stroke register: a preliminary report. *Bull World Health Organ* 1976;54:541-53.

19 van Swieten J C, Koudstaal P J, Visser M C, *et al.* Interobserver agreement for the assessment of handicap in stroke patients. *Stroke* 1988;19:604-7.

20 Brott T, Adams H P, Jr., Olinger C P, *et al.* Measurements of acute cerebral infarction: a clinical examination scale. *Stroke* 1989;20:864-70.

21 Madden K P, Karanjia P N, Adams H P, Jr., *et al.* Accuracy of initial stroke subtype diagnosis in the TOAST study. Trial of ORG 10172 in Acute Stroke Treatment. *Neurology* 1995;45:1975-9.

22 Dungan K M, Braithwaite S S, Preiser J C. Stress hyperglycaemia. *Lancet* 2009;373:1798-807.

23 Wang F, Jiang B, Kanesan L, *et al.* Higher admission fasting plasma glucose levels are associated with a poorer short-term neurologic outcome in acute ischemic stroke patients with good collateral circulation. *Acta Diabetol* 2018;55:703-14.

24 Yao M, Ni J, Zhou L, *et al.* Elevated Fasting Blood Glucose Is Predictive of Poor Outcome in Non-Diabetic Stroke Patients: A Sub-Group Analysis of SMART. *PLoS One* 2016;11:e0160674.

25 Zhao L, Wang L, Lu M, *et al.* Hyperglycemia is associated with poor in-hospital outcome in elderly patients with acute ischemic stroke. *Medicine (Baltimore)* 2019;98:e16723.

26 Xing L, Liu S, Tian Y, *et al.* C-R Relationship between Fasting Plasma Glucose and Unfavorable Outcomes in Patients of Ischemic Stroke without Diabetes. *J Stroke Cerebrovasc Dis* 2019;28:1400-08.

27 Marulaiah S K, Reddy M P, Basavegowda M, *et al.* Admission hyperglycemia an independent predictor of outcome in acute ischemic stroke: A longitudinal study from a tertiary care hospital in South India. *Niger J Clin Pract* 2017;20:573-80.

28 Hu G C, Hsieh S F, Chen Y M, *et al.* Relationship of initial glucose level and all-cause death in patients with ischaemic stroke: the roles of diabetes mellitus and glycated hemoglobin level. *Eur J Neurol* 2012;19:884-91.

29 Dong X L, Guan F, Xu S J, *et al.* Influence of blood glucose level on the prognosis of patients with diabetes mellitus complicated with ischemic stroke. *J Res Med Sci* 2018;23:10.

30 Stegenga M E, van der Crabben S N, Levi M, *et al.* Hyperglycemia stimulates coagulation, whereas hyperinsulinemia impairs fibrinolysis in healthy humans. *Diabetes* 2006;55:1807-12.

31 Gentile N T, Vaidyula V R, Kanamalla U, *et al.* Factor VIIa and tissue factor procoagulant activity in diabetes mellitus after acute ischemic stroke: impact of hyperglycemia. *Thromb Haemost* 2007;98:1007-13.

32 Fleming I, Busse R. Molecular mechanisms involved in the regulation of the endothelial nitric oxide synthase. *Am J Physiol Regul Integr Comp Physiol* 2003;284:R1-12.

33 Melikian N, Seddon M D, Casadei B, *et al.* Neuronal nitric oxide synthase and human vascular regulation. *Trends Cardiovasc Med* 2009;19:256-62.

34 Ding Y, Vaziri N D, Coulson R, *et al.* Effects of simulated hyperglycemia, insulin, and

- 1  
2  
3 glucagon on endothelial nitric oxide synthase expression. *American Journal of Physiology*  
4 *Endocrinology & Metabolism* 2000;279:E11.
- 5  
6 35 Du X L, Edelstein D, Dimmeler S, et al. Hyperglycemia inhibits endothelial nitric oxide  
7 synthase activity by posttranslational modification at the Akt site. *Journal of Clinical*  
8 *Investigation* 2001;108:1341-48.
- 9  
10 36 Yip P K, He Y Y, Hsu C Y, et al. Effect of plasma glucose on infarct size in focal cerebral  
11 ischemia-reperfusion. *Neurology* 1991;41:899-905.
- 12  
13 37 Quast M J, Wei J, Huang N C, et al. Perfusion deficit parallels exacerbation of cerebral  
14 ischemia/reperfusion injury in hyperglycemic rats. *J Cereb Blood Flow Metab* 1997;17:553-9.
- 15  
16 38 Duckrow R B, Beard D C, Brennan R W. Regional cerebral blood flow decreases during  
17 chronic and acute hyperglycemia. *Stroke* 1987;18:52-8.
- 18  
19 39 Bemeur C, Ste-Marie L, Montgomery J. Increased oxidative stress during hyperglycemic  
20 cerebral ischemia. *Neurochem Int* 2007;50:890-904.
- 21  
22 40 Esposito K, Nappo F, Marfella R, et al. Inflammatory cytokine concentrations are acutely  
23 increased by hyperglycemia in humans: role of oxidative stress. *Circulation* 2002;106:2067-72.
- 24  
25 41 Kawai N, Keep R F, Betz A L, et al. Hyperglycemia induces progressive changes in the  
26 cerebral microvasculature and blood-brain barrier transport during focal cerebral ischemia.  
27 *Acta Neurochir Suppl* 1998;71:219-21.
- 28  
29 42 Kamada H, Yu F, Nito C, et al. Influence of hyperglycemia on oxidative stress and matrix  
30 metalloproteinase-9 activation after focal cerebral ischemia/reperfusion in rats: relation to  
31 blood-brain barrier dysfunction. *Stroke* 2007;38:1044-9.
- 32  
33 43 Paciaroni M, Agnelli G, Caso V, et al. Acute hyperglycemia and early hemorrhagic  
34 transformation in ischemic stroke. *Cerebrovasc Dis* 2009;28:119-23.
- 35  
36 44 Lin S F, Chao A C, Hu H H, et al. Hyperglycemia predicts unfavorable outcomes in acute  
37 ischemic stroke patients treated with intravenous thrombolysis among a Chinese population: A  
38 prospective cohort study. *J Neurol Sci* 2018;388:195-202.
- 39  
40 45 Katsura K, Asplund B, Ekholm A, et al. Extra- and Intracellular pH in the Brain During  
41 Ischaemia, Related to Tissue Lactate Content in Normo- and Hypercapnic rats. *Eur J Neurosci*  
42 1992;4:166-76.
- 43  
44 46 Schurr A. Lactate: the ultimate cerebral oxidative energy substrate? *J Cereb Blood Flow*  
45 *Metab* 2006;26:142-52.
- 46  
47 47 Parsons M W, Barber P A, Desmond P M, et al. Acute hyperglycemia adversely affects  
48 stroke outcome: a magnetic resonance imaging and spectroscopy study. *Ann Neurol*  
49 2002;52:20-8.
- 50  
51  
52  
53  
54  
55  
56  
57  
58  
59  
60

**Table 1** Baseline characteristics of patients with AIS

| Demographic characteristics                   | DM Patients      |
|-----------------------------------------------|------------------|
| <i>N</i>                                      | 568              |
| Age(years), median (IQR)                      | 65(55-74)        |
| Male gender, n (%)                            | 377 (66.4)       |
| Vascular risk factors, n (%)                  |                  |
| Hypertension                                  | 398(70.1)        |
| Atrial fibrillation                           | 78(13.7)         |
| Hypercholesterolemia                          | 182 (32.0)       |
| Coronary heart disease                        | 75 (13.2)        |
| Previous TIA or stroke                        | 89 (15.7)        |
| Active smoking                                | 205 (36.1)       |
| Clinical findings                             |                  |
| BMI (kg/m <sup>2</sup> ), mean± SD            | 24.10±2.96       |
| Systolic blood pressure (mmHg), median (IQR)  | 148(130-166)     |
| Diastolic blood pressure (mmHg), median (IQR) | 83(75-93)        |
| TOAST classification, n (%)                   |                  |
| Large-vessel occlusive                        | 177(31.2)        |
| Small-vessel occlusive                        | 318(56.0)        |
| Cardioembolic                                 | 56(9.9)          |
| Other and Unknown                             | 17(3.0)          |
| HbA1c (%), median (IQR)                       | 6.6(5.8-8.3)     |
| FBG (mmol/L), median (IQR)                    | 7.37(5.99-10.10) |
| NIHSS at admission, median (IQR)              | 4(2-10)          |
| Reperfusion therapy, n (%)                    | 32(5.6)          |
| Unfavorable outcome at 3 months, n (%)        | 226(39.8)        |
| Mortality at 3 months, n (%)                  | 58(10.2)         |

AIS acute ischemic stroke; IQR interquartile range; TIA transient ischemic attack; BMI body mass index; SD standard deviation; TOAST Trial of Org 10172 in Acute Stroke Treatment; HbA1c hemoglobin A1c; FBG fasting blood glucose; NIHSS National Institutes of Health Stroke Scale.

**Table 2** Univariable and multivariable logistic regression analyses for unfavorable outcome and mortality

| Parameter                                        | Univariable analysis |                     |         | Multivariable analysis |                     |         |
|--------------------------------------------------|----------------------|---------------------|---------|------------------------|---------------------|---------|
|                                                  | OR                   | 95 %CI <sup>a</sup> | P value | OR                     | 95 %CI <sup>a</sup> | P value |
| <b>Predictor: Unfavorable functional outcome</b> |                      |                     |         |                        |                     |         |
| Age                                              | 1.03                 | 1.01-1.04           | <0.0001 | 1.02                   | 1.00-1.05           | 0.037   |
| Male gender                                      | 0.63                 | 0.45-0.90           | 0.011   | 0.72                   | 0.40-1.28           | 0.259   |
| Hypertension                                     | 0.92                 | 0.64-1.33           | 0.659   | —                      |                     |         |
| Atrial fibrillation                              | 2.19                 | 1.35-3.55           | 0.001   | 1.99                   | 0.80-5.06           | 0.151   |
| Hypercholesterolemia                             | 0.89                 | 0.62-1.28           | 0.530   | —                      |                     |         |
| Coronary heart disease                           | 1.89                 | 1.16-3.08           | 0.011   | 1.03                   | 0.47-2.28           | 0.940   |
| Previous TIA or stroke                           | 1.29                 | 0.82-2.03           | 0.280   | —                      |                     |         |
| Active Smoking                                   | 1.08                 | 0.76-1.53           | 0.664   | —                      |                     |         |
| BMI                                              | 0.97                 | 0.912-1.02          | 0.226   | —                      |                     |         |
| Systolic blood pressure                          | 1.00                 | 1.00-1.01           | 0.966   | —                      |                     |         |
| Diastolic blood pressure                         | 1.00                 | 1.00-1.01           | 0.875   | —                      |                     |         |
| Reperfusion therapy                              | 0.90                 | 0.43-1.89           | 0.785   | —                      |                     |         |
| NIHSS at admission                               | 1.58                 | 1.46-1.70           | <0.0001 | 1.42                   | 1.31-1.55           | <0.0001 |
| Large-vessel occlusive                           | 1.12                 | 0.38-3.35           | 0.839   | —                      |                     |         |
| Small-vessel occlusive                           | 0.07                 | 0.02-0.19           | <0.0001 | 0.24                   | 0.06-0.93           | 0.039   |
| Cardioembolic <sup>b</sup>                       | 1.25                 | 0.37-4.72           | 0.717   | —                      |                     |         |
| HbA1c (%)                                        | 1.11                 | 1.01-1.23           | 0.038   | 0.84                   | 0.71-1.01           | 0.056   |
| Fasting blood glucose                            | 1.38                 | 1.29-1.48           | <0.0001 | 1.25                   | 1.14-1.37           | <0.0001 |
| <b>Predictor: Mortality</b>                      |                      |                     |         |                        |                     |         |
| Age                                              | 1.01                 | 1.00-1.04           | 0.238   | —                      |                     |         |
| Male gender                                      | 0.69                 | 0.40-1.20           | 0.189   | —                      |                     |         |
| Hypertension                                     | 1.13                 | 0.62-2.09           | 0.681   | —                      |                     |         |
| Atrial fibrillation                              | 4.95                 | 2.72-9.02           | <0.0001 | 2.85                   | 1.16-7.01           | 0.023   |
| Hypercholesterolemia                             | 0.87                 | 0.48-1.57           | 0.638   | —                      |                     |         |
| Coronary heart disease                           | 2.09                 | 1.07-4.09           | 0.032   | 1.61                   | 0.67-3.90           | 0.287   |
| Previous TIA or stroke                           | 1.296                | 0.64-2.61           | 0.467   | —                      |                     |         |
| Active Smoking                                   | 1.50                 | 0.87-2.60           | 0.146   | —                      |                     |         |
| BMI                                              | 0.96                 | 0.87-1.05           | 0.337   | —                      |                     |         |
| Systolic blood pressure                          | 0.99                 | 0.98-1.00           | 0.135   | —                      |                     |         |
| Diastolic blood pressure                         | 1.00                 | 0.98-1.01           | 0.596   | —                      |                     |         |
| NIHSS at admission                               | 1.21                 | 1.16-1.26           | <0.0001 | 1.13                   | 1.08-1.19           | <0.0001 |
| Large-vessel occlusive                           | 0.89                 | 0.27-2.88           | 0.884   | —                      |                     |         |
| Reperfusion therapy                              | 1.28                 | 0.43-3.77           | 0.661   | —                      |                     |         |
| Small-vessel occlusive                           | 0.02                 | 0.00-0.12           | <0.0001 | 0.09                   | 0.01-0.67           | 0.019   |
| Cardioembolic                                    | 1.08                 | 0.30-3.87           | 0.902   | —                      |                     |         |
| HbA1c (%)                                        | 1.55                 | 1.34-1.79           | 0.000   | 1.49                   | 1.23-1.78           | 0.000   |
| Fasting blood glucose                            | 1.23                 | 1.15-1.31           | <0.0001 | 1.10                   | 1.01-1.19           | 0.025   |

OR odds ratio; CI confidence interval; TIA transient ischemic attack; BMI body mass index; NIHSS National Institutes of Health Stroke Scale

<sup>a</sup> Note that the odds ratio corresponds to a unit increase in the explanatory variable

<sup>b</sup> Other and unknown ischemic stroke subtype as the reference

1  
2  
3  
4  
5  
6  
7  
8  
9  
10  
11  
12  
13  
14  
15  
16  
17  
18  
19  
20  
21  
22  
23  
24  
25  
26  
27  
28  
29  
30  
31  
32  
33  
34  
35  
36  
37  
38  
39  
40  
41  
42  
43  
44  
45  
46  
47  
48  
49  
50  
51  
52  
53  
54  
55  
56  
57  
58  
59  
60

**Figure 1** The correlation between fasting blood glucose levels and the National Institutes of Health Stroke Scale (NIHSS); Spearman's analysis ( $r=0.417$ ,  $P<0.0001$ )

**Figure 2** Distribution of fasting blood glucose levels in patients with favorable and unfavorable outcomes. All data are the median and interquartile range (IQR). Mann–Whitney  $U$ -test ( $Z=-11.176$ ,  $P<0.0001$ )

**Figure 3** Distribution of fasting blood glucose levels in survivors and non-survivors. All data are the median and interquartile range (IQR). Mann–Whitney  $U$ -test ( $Z=-6.851$ ,  $P<0.0001$ )

**Figure 4** Kaplan–Meier survival based on fasting blood glucose (FBG) quartiles. Time-to-death was analyzed by Kaplan–Meier curves based on FBG quartiles. Patients in the lower two quartiles (FBG  $\leq 6.00$  mmol/L and  $6.00 < \text{FBG} \leq 7.37$  mmol/L) had a lower risk of mortality compared to patients with FBG levels in the higher two quartiles (FBG  $> 10.10$  mmol/L and  $7.37 < \text{FBG} \leq 10.10$  mmol/L,  $P<0.0001$ ).

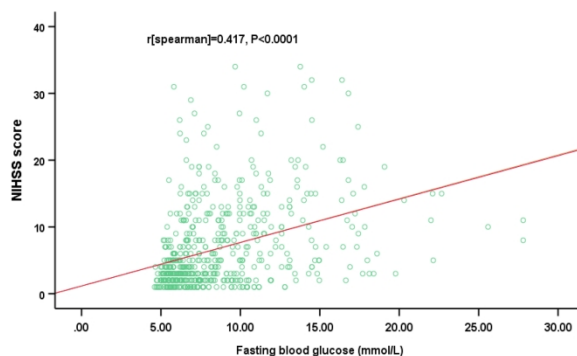

**Figure 1** The correlation between fasting blood glucose levels and the National Institutes of Health Stroke Scale (NIHSS); Spearman’s analysis ( $r=0.417$ ,  $P<0.0001$ ).

Figure 1 The correlation between fasting blood glucose levels and the National Institutes of Health Stroke Scale (NIHSS); Spearman’s analysis ( $r=0.417$ ,  $P<0.0001$ )

209x296mm (300 x 300 DPI)



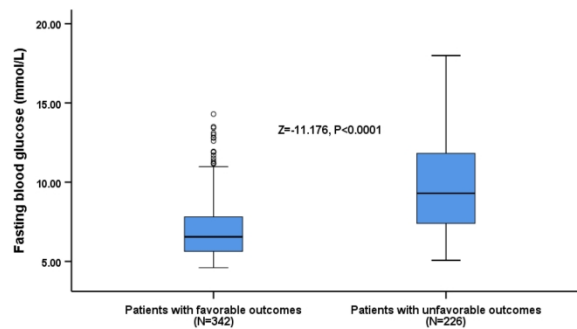

**Figure 2** Distribution of fasting blood glucose levels in patients with favorable and unfavorable outcomes. All data are the median and interquartile range (IQR). Mann-Whitney *U*-test ( $Z=-11.176$ ,  $P<0.0001$ )

Figure 2 Distribution of fasting blood glucose levels in patients with favorable and unfavorable outcomes. All data are the median and interquartile range (IQR). Mann-Whitney *U*-test ( $Z=-11.176$ ,  $P<0.0001$ )

209x296mm (300 x 300 DPI)

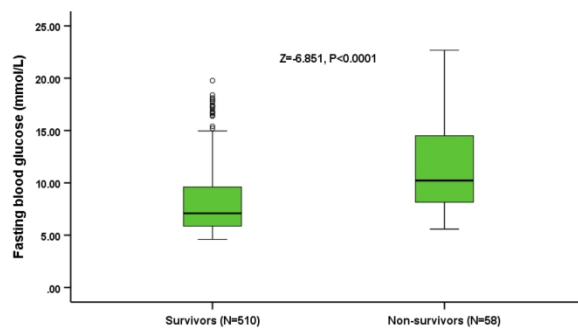

**Figure 3** Distribution of fasting blood glucose levels in survivors and non-survivors. All data are the median and interquartile range (IQR). Mann-Whitney *U*-test ( $Z = -6.851$ ,  $P < 0.0001$ )

Figure 3 Distribution of fasting blood glucose levels in survivors and non-survivors. All data are the median and interquartile range (IQR). Mann-Whitney *U*-test ( $Z = -6.851$ ,  $P < 0.0001$ )

209x296mm (300 x 300 DPI)

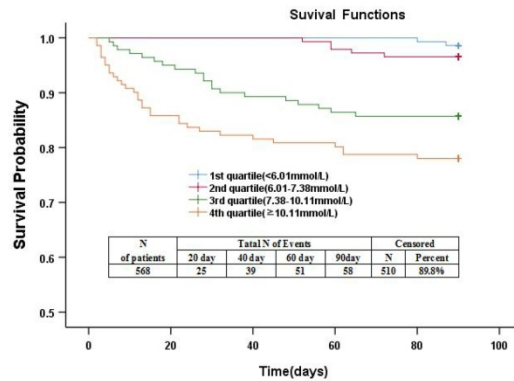

**Figure 4** Kaplan–Meier survival based on fasting blood glucose (FBG) quartiles. Time-to-death was analyzed by Kaplan–Meier curves based on FBG quartiles. Patients in the lower two quartiles (FBG  $\leq 6.00$  mmol/L and  $6.00 < \text{FBG} \leq 7.37$  mmol/L) had a lower risk of mortality compared to patients with FBG levels in the higher two quartiles (FBG  $> 10.10$  mmol/L and  $7.37 < \text{FBG} \leq 10.10$  mmol/L,  $P < 0.0001$ ).

Figure 4 Kaplan–Meier survival based on fasting blood glucose (FBG) quartiles. Time-to-death was analyzed by Kaplan–Meier curves based on FBG quartiles. Patients in the lower two quartiles (FBG  $\leq 6.00$  mmol/L and  $6.00 < \text{FBG} \leq 7.37$  mmol/L) had a lower risk of mortality compared to patients with FBG levels in the higher two quartiles (FBG  $> 10.10$  mmol/L and  $7.37 < \text{FBG} \leq 10.10$  mmol/L,  $P < 0.0001$ )

209x296mm (300 x 300 DPI)

STROBE Statement—Checklist of items that should be included in reports of *cohort studies*

|                              | Item No | Recommendation                                                                                                                                                                                                                                                                                                         | Page No   |
|------------------------------|---------|------------------------------------------------------------------------------------------------------------------------------------------------------------------------------------------------------------------------------------------------------------------------------------------------------------------------|-----------|
| <b>Title and abstract</b>    | 1       | (a) Indicate the study's design with a commonly used term in the title or the abstract<br>(b) Provide in the abstract an informative and balanced summary of what was done and what was found                                                                                                                          | 1, 2<br>2 |
| <b>Introduction</b>          |         |                                                                                                                                                                                                                                                                                                                        |           |
| Background/rationale         | 2       | Explain the scientific background and rationale for the investigation being reported                                                                                                                                                                                                                                   | 3         |
| Objectives                   | 3       | State specific objectives, including any prespecified hypotheses                                                                                                                                                                                                                                                       | 3         |
| <b>Methods</b>               |         |                                                                                                                                                                                                                                                                                                                        |           |
| Study design                 | 4       | Present key elements of study design early in the paper                                                                                                                                                                                                                                                                | 3         |
| Setting                      | 5       | Describe the setting, locations, and relevant dates, including periods of recruitment, exposure, follow-up, and data collection                                                                                                                                                                                        | 3         |
| Participants                 | 6       | (a) Give the eligibility criteria, and the sources and methods of selection of participants. Describe methods of follow-up<br>(b) For matched studies, give matching criteria and number of exposed and unexposed                                                                                                      | 3<br>3    |
| Variables                    | 7       | Clearly define all outcomes, exposures, predictors, potential confounders, and effect modifiers. Give diagnostic criteria, if applicable                                                                                                                                                                               | 3, 4      |
| Data sources/<br>measurement | 8*      | For each variable of interest, give sources of data and details of methods of assessment (measurement). Describe comparability of assessment methods if there is more than one group                                                                                                                                   | 4         |
| Bias                         | 9       | Describe any efforts to address potential sources of bias                                                                                                                                                                                                                                                              |           |
| Study size                   | 10      | Explain how the study size was arrived at                                                                                                                                                                                                                                                                              | 3         |
| Quantitative variables       | 11      | Explain how quantitative variables were handled in the analyses. If applicable, describe which groupings were chosen and why                                                                                                                                                                                           | 3         |
| Statistical methods          | 12      | (a) Describe all statistical methods, including those used to control for confounding<br>(b) Describe any methods used to examine subgroups and interactions<br>(c) Explain how missing data were addressed<br>(d) If applicable, explain how loss to follow-up was addressed<br>(e) Describe any sensitivity analyses | 4<br>4    |
| <b>Results</b>               |         |                                                                                                                                                                                                                                                                                                                        |           |
| Participants                 | 13*     | (a) Report numbers of individuals at each stage of study—eg numbers potentially eligible, examined for eligibility, confirmed eligible, included in the study, completing follow-up, and analysed<br>(b) Give reasons for non-participation at each stage<br>(c) Consider use of a flow diagram                        | 4         |
| Descriptive data             | 14*     | (a) Give characteristics of study participants (eg demographic, clinical, social) and information on exposures and potential confounders<br>(b) Indicate number of participants with missing data for each variable of interest<br>(c) Summarise follow-up time (eg, average and total amount)                         | 4<br>4    |
| Outcome data                 | 15*     | Report numbers of outcome events or summary measures over time                                                                                                                                                                                                                                                         | 4, 5      |

|    |                          |    |                                                                                                                                                                                                              |      |
|----|--------------------------|----|--------------------------------------------------------------------------------------------------------------------------------------------------------------------------------------------------------------|------|
| 1  | Main results             | 16 | (a) Give unadjusted estimates and, if applicable, confounder-adjusted estimates and their precision (eg, 95% confidence interval). Make clear which confounders were adjusted for and why they were included | 5    |
| 2  |                          |    | (b) Report category boundaries when continuous variables were categorized                                                                                                                                    | 5    |
| 3  |                          |    | (c) If relevant, consider translating estimates of relative risk into absolute risk for a meaningful time period                                                                                             | 5    |
| 4  |                          |    |                                                                                                                                                                                                              |      |
| 5  |                          |    |                                                                                                                                                                                                              |      |
| 6  |                          |    |                                                                                                                                                                                                              |      |
| 7  |                          |    |                                                                                                                                                                                                              |      |
| 8  |                          |    |                                                                                                                                                                                                              |      |
| 9  | Other analyses           | 17 | Report other analyses done—eg analyses of subgroups and interactions, and sensitivity analyses                                                                                                               | 5, 6 |
| 10 |                          |    |                                                                                                                                                                                                              |      |
| 11 | <b>Discussion</b>        |    |                                                                                                                                                                                                              |      |
| 12 |                          |    |                                                                                                                                                                                                              |      |
| 13 | Key results              | 18 | Summarise key results with reference to study objectives                                                                                                                                                     | 6    |
| 14 | Limitations              | 19 | Discuss limitations of the study, taking into account sources of potential bias or imprecision. Discuss both direction and magnitude of any potential bias                                                   | 7    |
| 15 |                          |    |                                                                                                                                                                                                              |      |
| 16 | Interpretation           | 20 | Give a cautious overall interpretation of results considering objectives, limitations, multiplicity of analyses, results from similar studies, and other relevant evidence                                   | 7    |
| 17 |                          |    |                                                                                                                                                                                                              |      |
| 18 |                          |    |                                                                                                                                                                                                              |      |
| 19 | Generalisability         | 21 | Discuss the generalisability (external validity) of the study results                                                                                                                                        | 7    |
| 20 |                          |    |                                                                                                                                                                                                              |      |
| 21 | <b>Other information</b> |    |                                                                                                                                                                                                              |      |
| 22 | Funding                  | 22 | Give the source of funding and the role of the funders for the present study and, if applicable, for the original study on which the present article is based                                                | 8    |
| 23 |                          |    |                                                                                                                                                                                                              |      |
| 24 |                          |    |                                                                                                                                                                                                              |      |

\*Give information separately for exposed and unexposed groups.

**Note:** An Explanation and Elaboration article discusses each checklist item and gives methodological background and published examples of transparent reporting. The STROBE checklist is best used in conjunction with this article (freely available on the Web sites of PLoS Medicine at <http://www.plosmedicine.org/>, Annals of Internal Medicine at <http://www.annals.org/>, and Epidemiology at <http://www.epidem.com/>). Information on the STROBE Initiative is available at <http://www.strobe-statement.org>.

# BMJ Open

## Association between fasting blood glucose and outcomes and mortality in acute ischemic stroke patients with diabetes mellitus: a retrospective observational study in Wuhan, China

|                                 |                                                                                                                                                                                                                                                                                                                                                                                                                                                                                                                            |
|---------------------------------|----------------------------------------------------------------------------------------------------------------------------------------------------------------------------------------------------------------------------------------------------------------------------------------------------------------------------------------------------------------------------------------------------------------------------------------------------------------------------------------------------------------------------|
| Journal:                        | <i>BMJ Open</i>                                                                                                                                                                                                                                                                                                                                                                                                                                                                                                            |
| Manuscript ID                   | bmjopen-2020-037291.R2                                                                                                                                                                                                                                                                                                                                                                                                                                                                                                     |
| Article Type:                   | Original research                                                                                                                                                                                                                                                                                                                                                                                                                                                                                                          |
| Date Submitted by the Author:   | 05-May-2020                                                                                                                                                                                                                                                                                                                                                                                                                                                                                                                |
| Complete List of Authors:       | Yao, Tao; Wuhan University Renmin Hospital, Department of Neurology<br>Zhan, Yanqiang; Wuhan University Renmin Hospital, Department of Neurology<br>Shen, Jing ; Wuhan University Renmin Hospital, Department of Neurology<br>Xu, Lu ; Wuhan University Renmin Hospital, Department of Neurology<br>Peng, Bo ; Wuhan University Renmin Hospital, Department of Neurology<br>Cui, Qin; Wuhan University Renmin Hospital, Department of Neurology<br>Liu, Zhichao; Wuhan University Renmin Hospital, Department of Neurology |
| <b>Primary Subject Heading</b>: | Neurology                                                                                                                                                                                                                                                                                                                                                                                                                                                                                                                  |
| Secondary Subject Heading:      | Intensive care, Diabetes and endocrinology, Emergency medicine, Global health                                                                                                                                                                                                                                                                                                                                                                                                                                              |
| Keywords:                       | NEUROLOGY, Stroke < NEUROLOGY, Neuropathology < NEUROLOGY, Diabetic neuropathy < DIABETES & ENDOCRINOLOGY                                                                                                                                                                                                                                                                                                                                                                                                                  |
|                                 |                                                                                                                                                                                                                                                                                                                                                                                                                                                                                                                            |

SCHOLARONE™  
Manuscripts



I, the Submitting Author has the right to grant and does grant on behalf of all authors of the Work (as defined in the below author licence), an exclusive licence and/or a non-exclusive licence for contributions from authors who are: i) UK Crown employees; ii) where BMJ has agreed a CC-BY licence shall apply, and/or iii) in accordance with the terms applicable for US Federal Government officers or employees acting as part of their official duties; on a worldwide, perpetual, irrevocable, royalty-free basis to BMJ Publishing Group Ltd ("BMJ") its licensees and where the relevant Journal is co-owned by BMJ to the co-owners of the Journal, to publish the Work in this journal and any other BMJ products and to exploit all rights, as set out in our [licence](#).

The Submitting Author accepts and understands that any supply made under these terms is made by BMJ to the Submitting Author unless you are acting as an employee on behalf of your employer or a postgraduate student of an affiliated institution which is paying any applicable article publishing charge ("APC") for Open Access articles. Where the Submitting Author wishes to make the Work available on an Open Access basis (and intends to pay the relevant APC), the terms of reuse of such Open Access shall be governed by a Creative Commons licence – details of these licences and which [Creative Commons](#) licence will apply to this Work are set out in our licence referred to above.

Other than as permitted in any relevant BMJ Author's Self Archiving Policies, I confirm this Work has not been accepted for publication elsewhere, is not being considered for publication elsewhere and does not duplicate material already published. I confirm all authors consent to publication of this Work and authorise the granting of this licence.

1  
2  
3  
4  
5  
6  
7 **Association between fasting blood glucose and outcomes and mortality**  
8  
9 **in acute ischemic stroke patients with diabetes mellitus: a retrospective**  
10 **observational study in Wuhan, China**  
11  
12  
13  
14  
15  
16  
17

18 **Full names for all authors:**

19  
20 **Tao Yao, Yan-Qiang Zhan, Jing Shen, Lu Xu, Bo Peng, Qin Cui, Zhi-Chao Liu\***  
21  
22

23  
24 **Institutional addresses for all authors:**

25 Department of Neurology, Wuhan University, Renmin Hospital, Wuhan, 430060, Hubei Province,  
26 P.R.C.  
27  
28  
29

30  
31  
32 **Email addresses for all authors:**

33 Tao Yao: yaotao@whu.edu.cn; <https://orcid.org/0000-0001-8450-7201>

34 Yan-Qiang Zhan: zhanyq77@163.com; <https://orcid.org/0000-0001-7265-7368>

35 Jing Shen: 81642309@qq.com

36 Lu Xu: 1171505714@qq.com

37 Bo Peng: pengbo\_whu@hotmail.com

38 Qin Cui: cuiqin2468@163.com; <https://orcid.org/0000-0002-8165-246X>

39 Zhi-Chao Liu: zhichao.liu@whu.edu.cn; <https://orcid.org/0000-0001-9548-7883>  
40  
41  
42  
43

44 **Corresponding author:**

45 **Zhi-Chao Liu** Email: zhichao.liu@whu.edu.cn; Tel:86 13986160231  
46  
47  
48  
49

50 **Word count:3002**  
51  
52  
53  
54  
55  
56  
57  
58  
59  
60



## ABSTRACT

**Objective** To evaluate the predictive value of fasting blood glucose (FBG) on unfavorable outcomes and mortality in diabetes mellitus (DM) patients after acute ischemic stroke (AIS).

**Study design** A hospital-based observational cohort study was conducted. Clinical data, including sex, age, BMI, vascular risk factors, and systolic/diastolic blood pressure, were routinely collected. National Institute of Health Stroke Scale (NIHSS) score was used to assess stroke severity on admission. FBG was determined on the first day after fasting for at least 8 hours. The modified Rankin Scale (mRS) was used to assess functional outcome at 90 days: 3-6, unfavorable outcome; 6, death.

**Setting** Renmin Hospital of Wuhan University, Wuhan, China.

**Participants** AIS patients with DM who were consecutively admitted within 24 hours of onset from January 2018 to June 2019.

**Results** For the 568 patients, the median age was 65 years [interquartile range (IQR), 55-74]. There were 377 (66.4%) men. The median FBG values were 7.37 mmol/L (IQR, 5.99-10.10 mmol/L), and the median glycosylated hemoglobin (HbA1c) values were 6.6 (IQR, 5.8-8.3). Multivariable logistic and Cox regression analysis of confounding factors showed that FBG at the time of admission was an independent predictor of unfavorable outcome [odds ratio (OR), 1.25 (1.14-1.37);  $P < 0.0001$ ] and mortality [hazard ratio (HR), 1.10 (1.03-1.15);  $P < 0.05$ ] at 90 days after onset. Time to death was analyzed by Kaplan–Meier curves based on FBG quartiles. The risk of death in the two highest quartile groups (FBG, 7.38-10.10 mmol/L; FBG,  $\geq 10.11$  mmol/L) was significantly higher than that in the two lowest quartile groups (FBG,  $\leq 6.00$  mmol/L; FBG, 6.01-7.37 mmol/L) ( $P < 0.0001$ ).

**Conclusions** Higher FBG levels are associated with unfavorable outcomes and mortality in Chinese AIS patients with DM. Our data contribute to the knowledge regarding the relationship between FBG and outcome in AIS with DM.

### Strengths and limitations of this study

- This study evaluated the predictive value of FBG at admission with regard to short-term outcome. Previous studies focusing on this evaluation are rare.
- Complete follow-up was achieved in this study.
- The study used routinely collected clinical data and practical statistical methods to correct the effects of confounding factors.
- This study was conducted in a single center with a limited sample size.
- Data of random blood glucose as a possible meaningful predictor were not fully available in this retrospective study.

## INTRODUCTION

Diabetes mellitus (DM) is recognized as an important risk factor for ischemic stroke.<sup>1 2</sup> Previous epidemiologic investigations have confirmed that patients with DM have a high disability rate and a high risk of in-hospital death after an acute ischemic stroke (AIS).<sup>3 4</sup> A recent study involving a Chinese population included 10,331 patients with DM who were confirmed to have an AIS showed a high risk for in-hospital death.<sup>5</sup> Indeed, assessment of functional outcome and mortality risk among AIS patients with diabetes is a common concern for both patients and clinicians.

Hyperglycemia is common in AIS patients with and without DM.<sup>6</sup> Many studies have shown that hyperglycemia at the time of admission is associated with AIS infarct volume.<sup>7</sup> This condition can also predict functional outcome and risk of death.<sup>8-10</sup> However, few studies have focused on DM patients with hyperglycemia at the time of admission. Studies have shown that high blood glucose levels in DM patients have no significant predictive value for functional outcomes and risk of death.<sup>11</sup> Moreover, two recent studies have confirmed that high blood glucose levels are predictive of functional outcomes in diabetic and non-diabetic patients complicated by cerebral infarction.<sup>12 13</sup> Therefore, the correlation between blood glucose levels and functional outcomes in DM patients should be defined so that clinicians can provide accurate prognosis and eventually develop glycemic control strategies after an ischemic stroke.

Because fasting blood glucose (FBG) can minimize the effects of diet,<sup>14</sup> the FBG level is considered a more reliable blood glucose level detection tool than random blood glucose levels.<sup>15</sup> Compared to random blood glucose levels, FBG level provides a stronger predictor of functional outcomes.<sup>16 17</sup>

Hence, this study aimed to investigate the predictive value of FBG on functional outcomes and mortality in Chinese AIS patients with DM.

## METHODS

### Patients and Study Design

This retrospective observational study collected information involving AIS patients with DM who were admitted to the Department of Neurology of the Renmin Hospital of Wuhan University from January 2018 to June 2019. The diagnostic criteria for acute cerebral infarction are in accordance with World Health Organization standards.<sup>18</sup> Patients with DM were defined as patients with a history of DM before admission according to their medical records or those who received drugs or insulin for hypoglycemic treatment after admission. Patients must meet the following criteria: onset was within 24 h; age  $\geq$  18 years; and, in the case of a recurrent cerebral infarction, a modified Rankin Scale (mRS)  $\leq$  2.<sup>19</sup> Patients with psychoses, severe bone joint diseases, and other neurologic diseases that affect functional outcomes were excluded from the study.

The study was approved by the Ethics Committee of the Renmin Hospital of Wuhan University. Signed informed consent was obtained for all patients participating in the study.

### Clinical Variables and Neuroimaging

All patients completed diagnostic testing after admission, including routine serologic testing, neuroimaging, intracranial and extravascular studies, and a cardiac examination. Clinical data were routinely collected at the time of admission, included gender, age, BMI, notation of vascular risk factors (including hypertension, DM, coronary heart disease, atrial fibrillation, hypercholesterolemia,

stroke history, and smoking history), and systolic/diastolic blood pressure. The severity of stroke at the time of admission was assessed using the National Institutes of Health Stroke Scale (NIHSS).<sup>20</sup> Reperfusion therapy included IV thrombolysis with rtPA and endovascular therapy with intra-arterial thrombolysis or mechanical thrombectomy. The causes of stroke were grouped according to the Trial of Org 10172 in Acute Stroke Treatment (TOAST),<sup>21</sup> as follows: large-vessel occlusive; small-vessel occlusive; cardioembolic; and other and unknown. Patients underwent a CT scan and/or MRI examination within 24-48 h after admission. The diagnosis of cerebral infarction was based on these images.

### End Points and Follow-up

The mRS score at 90 days was used as an indicator of functional outcomes, as follows:  $\leq 2$ , good outcome; 3-6, unfavorable outcome; and 6, death. Two specially trained neurologic nurses were responsible for assessing functional outcomes of AIS patients by calling patients or their family members once a month.

### Laboratory Testing

To minimize the impact of diet on the blood glucose level, FBG levels were used as a reliable glycemic index. Blood samples were collected at approximately 7:30 am on the first day after admission after fasting for at least 8 hours. Glycosylated hemoglobin (HbA1c) was tested using standard test methods.

### Statistical Analysis

Data following normal distribution were described using the mean  $\pm$  standard deviation. Data following a non-normal distribution were described using the median (quartiles). Categorical variables were described using a percentage. The Mann–Whitney U test was used to compare the non-normal distribution between two groups. The Pearson correlation coefficient and Spearman's rank correlation coefficient were used for liner correlation analysis.. The continuous variables proved to be linearly correlated with the outcomes were brought into the regression model. We used univariable logistic regression to analyze the relationship between factors and outcomes of acute cerebral infarction at 90 days . We used univariable Cox regression to analyze the relationship between factors and mortality of acute cerebral infarction at 90 days. Factors giving a  $P < 0.1$  were re-analyzed using multivariable regression analysis to determine the correlation between the FBG level and functional outcomes of cerebral infarction, as well as death. The results are expressed by ORs and 95% CIs. Moreover, we performed quartiles based on FBG levels as follows: quartile 1 (FBG  $\leq 6.00$  mmol/L); quartile 2 (FBG, 6.01-7.37 mmol/L); quartile 3 (FBG, 7.38-10.10 mmol/L); and quartile 4 (FBG  $\geq 10.11$  mmol/L). Kaplan–Meier survival curves were used to analyze the value of the FBG level for predicting death. SPSS (version 25.0; SPSS, Inc., Chicago, IL, USA) was used for statistical analysis. A  $P < 0.05$  indicates a significant difference.

### Patient and public involvement

No patients were involved with design, data provision, analysis, or publication of the study.

## RESULTS

### Baseline Characteristics of the Study Cohort

A total of 568 AIS patients with DM, including 377 males and 191 females, were enrolled in this study and all were followed up. The median age of the patients was 65 years (IQR, 55-74 years), and the mean BMI was  $24.10 \pm 2.96$  kg/m<sup>2</sup>. The median NIHSS score at the time of admission was 4 (IQR, 2-10). A total of 32 of 568 AIS patients received reperfusion therapy, including 28 patients with IV rtPA thrombolysis and 7 patients with endovascular treatment. A total of 226 patients (39.8%) had unfavorable outcomes, including 58 deaths (10.2%). Of the 58 deaths in this study, 36 (62.1%) died of increased intracranial pressure; 10 (17.2%) died of cardiac diseases such as heart failure, myocardial infarction, or arrhythmia; and 12 (20.7%) died of other causes such as severe pneumonia, stress ulcer bleeding, or pulmonary embolism. Moreover, 14 (24.1%) had symptomatic intracerebral hemorrhages. The baseline data of all patients at the time of admission are shown in Table 1.

### Main Results

The median FBG values were 7.37 mmol/L (IQR, 5.99-10.10 mmol /L). The NIHSS scores of AIS patients with DM at the time of admission increased with elevation of the FBG levels. A moderately significant positive correlation was found between the NIHSS score and the FBG level ( $r = 0.417$ ,  $P < 0.0001$ ). The results are shown in Figure 1. The results also showed that FBG levels had no significant correlation with other risk factors, including smoking, hypertension, coronary heart disease, hypercholesterolemia history, or a history of stroke ( $P > 0.05$ ).

### FBG level and functional outcome at 90 days

FBG levels of 226 patients with unfavorable functional outcomes at 90 days [9.64 mmol/L (IQR, 7.40-12.60 mmol /L)] were significantly higher than patients with favorable functional outcomes [6.56 mmol/L (IQR, 5.64-7.86 mmol /L);  $Z = -11.176$ ;  $P < 0.0001$ ; Figure 2]. Univariable regression analysis showed that unfavorable functional outcomes were significantly correlated with age, male gender, atrial fibrillation, coronary heart disease, NIHSSNIHSS score, small-vessel occlusion, HbA1c, and FBG level ( $P < 0.05$ ). Multivariable logistic regression analysis was performed on outcome-indicating factors. The results showed that age (OR, 1.02; 95%CI, 1.00-1.05;  $P = 0.037$ ), NIHSSNIHSS score (OR, 1.42; 95%CI, 1.31-1.55;  $P < 0.0001$ ), small-vessel occlusion (OR, 0.24; 95%CI, 0.06-0.93;  $P = 0.039$ ), and FBG level (OR, 1.25; 95%CI, 1.14-1.37;  $P < 0.0001$ ) were independent predictive factors of functional outcome for AIS patients with DM (Table 2).

### FBG levels and mortality at 90 days

The FBG levels of 58 nonsurviving patients at 90 days were significantly higher than surviving patients [10.41 mmol/L (IQR, 8.14-15.29 mmol /L vs. 7.10 mmol/L (IQR, 5.88-9.65 mmol /L);  $Z = -6.851$ ,  $P < 0.0001$ ; Figure 3]. Univariable Cox regression analysis of nonsurviving patients showed that atrial fibrillation, coronary heart disease, NIHSS score, small-vessel occlusive disease, HbA1c, and FBG level were significantly associated with death ( $P < 0.05$ ). Multivariable Cox regression analysis was performed on functional-outcome-indicating factors and the results showed that atrial fibrillation [hazard ratio (HR), 2.17; 95%CI, 1.20-3.93;  $P = 0.011$ ], NIHSS score (HR, 1.11; 95%CI,

1  
2  
3 1.08-1.15;  $P < 0.0001$ ), small-vessel occlusive (HR, 0.07; 95%CI, 0.12-0.38;  $P = 0.002$ ), HbA1c (HR,  
4 1.32; 95%CI, 1.15-1.51;  $P < 0.0001$ ), and FBG levels (HR, 1.10; 95%CI, 1.03-1.15;  $P=0.004$ ; Table  
5 3) were independent predictive factors of death for AIS patients with DM.  
6

7 We used Kaplan-Meier curves to compare the quartiles of FBG levels and time to death after  
8 admission. The results showed that the risk of death in the two highest quartile groups (FBG,  
9 7.38-10.10 mmol/L; and FBG,  $\geq 10.11$  mmol/L) was significantly higher than the two  
10 lowest quartile groups (FBG,  $\leq 6.00$  mmol/L; and FBG, 6.01-7.37 mmol/L;  $P < 0.0001$ ; Figure 4).  
11  
12  
13

## 14 15 **DISCUSSION**

16 In this retrospective study, we found that higher fasting blood glucose levels are associated with  
17 unfavorable outcomes and mortality in Chinese AIS patients with DM. Moreover, higher FBG was  
18 associated with higher NIHSS score on admission.  
19

20 Acute stroke may be accompanied by neuroendocrine disorders and inflammation, resulting in an  
21 acute blood glucose elevation.<sup>22</sup> Previous studies focusing on acute blood glucose elevations  
22 generally used fasting or random blood glucose levels at the time of admission as an indicator of  
23 acute blood glucose. A meta-analysis involving 32 studies showed that acute stroke patients often  
24 had high blood glucose levels, and the proportion of high blood glucose levels in acute stroke  
25 patients with and without DM reached 8%-63% and 39%-83%, respectively.<sup>6</sup> A number of studies  
26 have shown that high blood glucose levels at the time of admission are closely related to the  
27 functional outcome of patients with AIS.<sup>9 10 23 24</sup> Masrur et al.<sup>9</sup> studied 1408 AIS patients who  
28 received intravenous thrombolysis and showed that high blood glucose levels at the time of  
29 admission increased the risk of unfavorable functional outcomes and death. Snarska et al.<sup>10</sup> and  
30 Zhao et al.<sup>25</sup> reported that a high blood glucose level in AIS patients at the time of admission was  
31 significantly associated with an unfavorable functional outcome and risk of in-hospital  
32 death. Moreover, several previous studies involving AIS patients without DM showed that high  
33 blood glucose levels were also closely related to unfavorable functional outcomes and risk of death.<sup>24</sup>  
34  
35  
36  
37  
38  
39

40 Because the focus of previous studies was on AIS patients only or AIS patients without DM, acute  
41 blood glucose levels at the time of admission among AIS patients with DM were not adequately  
42 addressed; thus, the predictive value for unfavorable functional outcomes or mortality has not been  
43 established.<sup>12 13 26-28</sup> Yao et al.<sup>24</sup> and Hu et al.<sup>28</sup> showed that in AIS patients without DM, high FBG  
44 levels predicted unfavorable functional outcomes and death; however, similar levels for AIS patients  
45 with DM had an insignificant predictive value. Tsuga et al.<sup>12</sup> and Sung et al.<sup>13</sup> performed subgroup  
46 analysis on AIS patients with and without DM and showed that acute blood glucose levels in both  
47 groups had predictive power for functional outcomes. Recently, a meta-analysis incorporated 13  
48 studies and showed no statistical difference existed in prognostic indicators between AIS patients  
49 with and without DM.<sup>29</sup> In this study, we used baseline FBG levels at the time of admission as a  
50 marker for the acute blood glucose level. The results revealed additional evidence for the predictive  
51 value of high acute blood glucose levels on functional outcomes and high risk of death in  
52 AIS patients with DM.  
53  
54  
55

56 The mechanism underlying the predictive value of high blood glucose levels at the time of  
57 admission on functional outcome and mortality is not fully understood; however, the correlation  
58 between a high blood glucose level after AIS and the severity of stroke and unfavorable functional  
59  
60

1  
2  
3 outcomes may be summarized as follows. First, a high blood glucose level can affect the balance  
4 between the coagulation and fibrinolytic systems, resulting in impaired recanalization.<sup>30 31</sup> Second, a  
5 high blood glucose level may affect endothelium-derived nitric-oxide-mediated vasodilation, thereby  
6 reducing intracranial blood flow and reperfusion at the infarct site.<sup>32 33</sup> In vitro studies have shown  
7 that nitric oxide synthase 3 gene expression and nitric oxide production are reduced  
8 in hyperglycemic conditions.<sup>34 35</sup> Clinical studies have shown that cerebral infarction tissue  
9 reperfusion is decreased and infarct volume is increased in patients with high blood glucose  
10 levels.<sup>36-38</sup> Third, a high blood glucose level may generate oxidative stress, leading to  
11 neuroendocrine disorders and inflammatory reactions,<sup>39 40</sup> blood-brain barrier disruption,<sup>41</sup> and  
12 eventually reperfusion injury.<sup>37 42</sup> Two clinical studies have shown that ischemic stroke patients with  
13 acute high blood glucose levels are at increased risk for hemorrhagic transformation,<sup>43</sup> and cerebral  
14 hemorrhage in patients with thrombolysis leads to unfavorable functional outcomes.<sup>44</sup> High blood  
15 glucose levels may increase the risk of vascular reperfusion injury. Fourth, patients with DM  
16 generally have insufficient insulin secretion or insulin resistance; therefore, anaerobic glycolysis may  
17 increase in patients with high blood glucose levels,<sup>45 46</sup> resulting in brain tissue lactic acid  
18 accumulation and internal environment disorders that aggravate brain tissue damage.<sup>47</sup> All of these  
19 pathologic changes together cause severe stroke and secondary functional outcomes and death.

### 26 **Strengths and limitations**

27  
28 This study had the following highlights. First, quite a few studies have evaluated the association  
29 between blood glucose level and outcomes of AIS patients without DM; however, to the best of our  
30 knowledge, no studies have evaluated these conditions in patients with DM<sup>24 26</sup>. Furthermore,  
31 complete follow-up of all patients was achieved in this study. Third, this study used routinely  
32 collected clinical data such as gender, age, BMI, vascular risk factors, NIHSS score,  
33 systolic/diastolic blood pressure, and reperfusion therapy. Additionally, practical statistical methods  
34 were used to correct the effects of confounding factors.

35  
36 This study also had limitations. First, a single center was used and sample size was  
37 limited. Second, data of random blood glucose as a possible meaningful predictor were not fully  
38 available in this retrospective study. Therefore, we cannot investigate the predictive value of random  
39 blood glucose compared with FBG.

### 43 **CONCLUSIONS**

44  
45 In conclusion, higher fasting blood glucose levels are associated with unfavorable outcomes and  
46 mortality in Chinese AIS patients with DM. Our data contribute to the knowledge for clinicians  
47 about the relation between FBG and outcome in AIS with DM.  
48  
49  
50  
51  
52  
53  
54  
55  
56  
57  
58  
59  
60

1  
2  
3  
4  
5  
6  
7  
8  
9  
10  
11  
12 **Author affiliations** Department of Neurology, Wuhan University, Renmin Hospital, Wuhan,  
13 430060, Hubei Province, P.R.C.  
14

15  
16 **Acknowledgments** We would like to acknowledge all the study participants. We would like to thank  
17 Editage (www.editage.com) for English language editing.  
18

19  
20 **Contributors** TY analyzed and interpreted the results and wrote this manuscript text. TY, YQZ, JS,  
21 BP, LX, and QC had full access to all of the data in the study and took responsibility for the integrity  
22 of the data and accuracy of the data analysis. TY, YQZ, and ZCL designed the study. All authors  
23 reviewed and approved the manuscript.  
24

25  
26 **Funding** This work was supported by the Guide Foundation of Wuhan University  
27 (RMYD2018M09).  
28

29  
30 **Disclaimer** The funders had no role in the study design, data collection, analysis, interpretation or  
31 decision to submit the manuscript for publication.  
32

33  
34 **Competing interests** None declared.  
35

36  
37 **Patient consent for publication** Not required.  
38

39  
40 **Ethics approval** This study is approved by the Ethics Committee of Wuhan University Renmin  
41 hospital (No. WDRY2017-K038).  
42

43  
44 **Provenance and peer review** Not commissioned; externally peer reviewed.  
45

46  
47 **Data availability statement** Data are available upon reasonable request from corresponding author.  
48  
49  
50  
51  
52  
53  
54  
55  
56  
57  
58  
59  
60

## References

- 1 Cui R, Iso H, Yamagishi K, *et al.* Diabetes mellitus and risk of stroke and its subtypes among Japanese: the Japan public health center study. *Stroke* 2011;42:2611-4.
- 2 O'Donnell M J, Chin S L, Rangarajan S, *et al.* Global and regional effects of potentially modifiable risk factors associated with acute stroke in 32 countries (INTERSTROKE): a case-control study. *Lancet* 2016;388:761-75.
- 3 Andersen K K, Olsen T S. One-month to 10-year survival in the Copenhagen stroke study: interactions between stroke severity and other prognostic indicators. *J Stroke Cerebrovasc Dis* 2011;20:117-23.
- 4 Reeves M J, Vaidya R S, Fonarow G C, *et al.* Quality of care and outcomes in patients with diabetes hospitalized with ischemic stroke: findings from Get With the Guidelines-Stroke. *Stroke* 2010;41:e409-17.
- 5 Si Y, Xiao X, Xiang S, *et al.* Mortality-specific comorbidity among inpatients with ischemic stroke in West China. *Acta Neurol Scand* 2019.
- 6 Capes S E, Hunt D, Malmberg K, *et al.* Stress hyperglycemia and prognosis of stroke in nondiabetic and diabetic patients: a systematic overview. *Stroke* 2001;32:2426-32.
- 7 Baird T A, Parsons M W, Phan T, *et al.* Persistent poststroke hyperglycemia is independently associated with infarct expansion and worse clinical outcome. *Stroke* 2003;34:2208-14.
- 8 Powers W J, Rabinstein A A, Ackerson T, *et al.* 2018 Guidelines for the Early Management of Patients With Acute Ischemic Stroke: A Guideline for Healthcare Professionals From the American Heart Association/American Stroke Association. *Stroke* 2018;49:e46-e110.
- 9 Masrur S, Cox M, Bhatt D L, *et al.* Association of Acute and Chronic Hyperglycemia With Acute Ischemic Stroke Outcomes Post-Thrombolysis: Findings From Get With The Guidelines-Stroke. *J Am Heart Assoc* 2015;4:e002193.
- 10 Snarska K K, Bachorzewska-Gajewska H, Kapica-Topczewska K, *et al.* Hyperglycemia and diabetes have different impacts on outcome of ischemic and hemorrhagic stroke. *Arch Med Sci* 2017;13:100-08.
- 11 Xue W-Y, Xu Y-C, Wu Y-W, *et al.* Observation of elevated fasting blood glucose and functional outcome after ischemic stroke in patients with and without diabetes. *Oncotarget* 2017;8.
- 12 Zsuga J, Gesztelyi R, Kemeny-Beke A, *et al.* Different effect of hyperglycemia on stroke outcome in non-diabetic and diabetic patients — a cohort study. *Neurological Research* 2012;34:72-79.
- 13 Sung J Y, Chen C I, Hsieh Y C, *et al.* Comparison of admission random glucose, fasting glucose, and glycated hemoglobin in predicting the neurological outcome of acute ischemic stroke: a retrospective study. *PeerJ* 2017;5:e2948.
- 14 Moebus S, Gores L, Losch C, *et al.* Impact of time since last caloric intake on blood glucose levels. *Eur J Epidemiol* 2011;26:719-28.
- 15 Standards of medical care in diabetes--2014. *Diabetes Care* 2014;37 Suppl 1:S14-80.
- 16 Osei E, Fonville S, Zandbergen A A M, *et al.* Impaired fasting glucose is associated with unfavorable outcome in ischemic stroke patients treated with intravenous alteplase. *J Neurol*



- 2018;265:1426-31.
- 17 Cao W, Ling Y, Wu F, *et al.* Higher fasting glucose next day after intravenous thrombolysis is independently associated with poor outcome in acute ischemic stroke. *J Stroke Cerebrovasc Dis* 2015;24:100-3.
- 18 Hatano S. Experience from a multicentre stroke register: a preliminary report. *Bull World Health Organ* 1976;54:541-53.
- 19 van Swieten J C, Koudstaal P J, Visser M C, *et al.* Interobserver agreement for the assessment of handicap in stroke patients. *Stroke* 1988;19:604-7.
- 20 Brott T, Adams H P, Jr., Olinger C P, *et al.* Measurements of acute cerebral infarction: a clinical examination scale. *Stroke* 1989;20:864-70.
- 21 Madden K P, Karanjia P N, Adams H P, Jr., *et al.* Accuracy of initial stroke subtype diagnosis in the TOAST study. Trial of ORG 10172 in Acute Stroke Treatment. *Neurology* 1995;45:1975-9.
- 22 Dungan K M, Braithwaite S S, Preiser J C. Stress hyperglycaemia. *Lancet* 2009;373:1798-807.
- 23 Wang F, Jiang B, Kanesan L, *et al.* Higher admission fasting plasma glucose levels are associated with a poorer short-term neurologic outcome in acute ischemic stroke patients with good collateral circulation. *Acta Diabetol* 2018;55:703-14.
- 24 Yao M, Ni J, Zhou L, *et al.* Elevated Fasting Blood Glucose Is Predictive of Poor Outcome in Non-Diabetic Stroke Patients: A Sub-Group Analysis of SMART. *PLoS One* 2016;11:e0160674.
- 25 Zhao L, Wang L, Lu M, *et al.* Hyperglycemia is associated with poor in-hospital outcome in elderly patients with acute ischemic stroke. *Medicine (Baltimore)* 2019;98:e16723.
- 26 Xing L, Liu S, Tian Y, *et al.* C-R Relationship between Fasting Plasma Glucose and Unfavorable Outcomes in Patients of Ischemic Stroke without Diabetes. *J Stroke Cerebrovasc Dis* 2019;28:1400-08.
- 27 Marulaiah S K, Reddy M P, Basavegowda M, *et al.* Admission hyperglycemia an independent predictor of outcome in acute ischemic stroke: A longitudinal study from a tertiary care hospital in South India. *Niger J Clin Pract* 2017;20:573-80.
- 28 Hu G C, Hsieh S F, Chen Y M, *et al.* Relationship of initial glucose level and all-cause death in patients with ischaemic stroke: the roles of diabetes mellitus and glycated hemoglobin level. *Eur J Neurol* 2012;19:884-91.
- 29 Dong X L, Guan F, Xu S J, *et al.* Influence of blood glucose level on the prognosis of patients with diabetes mellitus complicated with ischemic stroke. *J Res Med Sci* 2018;23:10.
- 30 Stegenga M E, van der Crabben S N, Levi M, *et al.* Hyperglycemia stimulates coagulation, whereas hyperinsulinemia impairs fibrinolysis in healthy humans. *Diabetes* 2006;55:1807-12.
- 31 Gentile N T, Vaidyula V R, Kanamalla U, *et al.* Factor VIIa and tissue factor procoagulant activity in diabetes mellitus after acute ischemic stroke: impact of hyperglycemia. *Thromb Haemost* 2007;98:1007-13.
- 32 Fleming I, Busse R. Molecular mechanisms involved in the regulation of the endothelial nitric oxide synthase. *Am J Physiol Regul Integr Comp Physiol* 2003;284:R1-12.
- 33 Melikian N, Seddon M D, Casadei B, *et al.* Neuronal nitric oxide synthase and human vascular regulation. *Trends Cardiovasc Med* 2009;19:256-62.
- 34 Ding Y, Vaziri N D, Coulson R, *et al.* Effects of simulated hyperglycemia, insulin, and

- 1  
2  
3 glucagon on endothelial nitric oxide synthase expression. *American Journal of Physiology*  
4 *Endocrinology & Metabolism* 2000;279:E11.
- 5  
6 35 Du X L, Edelstein D, Dimmeler S, et al. Hyperglycemia inhibits endothelial nitric oxide  
7 synthase activity by posttranslational modification at the Akt site. *Journal of Clinical*  
8 *Investigation* 2001;108:1341-48.
- 9  
10 36 Yip P K, He Y Y, Hsu C Y, et al. Effect of plasma glucose on infarct size in focal cerebral  
11 ischemia-reperfusion. *Neurology* 1991;41:899-905.
- 12  
13 37 Quast M J, Wei J, Huang N C, et al. Perfusion deficit parallels exacerbation of cerebral  
14 ischemia/reperfusion injury in hyperglycemic rats. *J Cereb Blood Flow Metab* 1997;17:553-9.
- 15  
16 38 Duckrow R B, Beard D C, Brennan R W. Regional cerebral blood flow decreases during  
17 chronic and acute hyperglycemia. *Stroke* 1987;18:52-8.
- 18  
19 39 Bemeur C, Ste-Marie L, Montgomery J. Increased oxidative stress during hyperglycemic  
20 cerebral ischemia. *Neurochem Int* 2007;50:890-904.
- 21  
22 40 Esposito K, Nappo F, Marfella R, et al. Inflammatory cytokine concentrations are acutely  
23 increased by hyperglycemia in humans: role of oxidative stress. *Circulation* 2002;106:2067-72.
- 24  
25 41 Kawai N, Keep R F, Betz A L, et al. Hyperglycemia induces progressive changes in the  
26 cerebral microvasculature and blood-brain barrier transport during focal cerebral ischemia.  
27 *Acta Neurochir Suppl* 1998;71:219-21.
- 28  
29 42 Kamada H, Yu F, Nito C, et al. Influence of hyperglycemia on oxidative stress and matrix  
30 metalloproteinase-9 activation after focal cerebral ischemia/reperfusion in rats: relation to  
31 blood-brain barrier dysfunction. *Stroke* 2007;38:1044-9.
- 32  
33 43 Paciaroni M, Agnelli G, Caso V, et al. Acute hyperglycemia and early hemorrhagic  
34 transformation in ischemic stroke. *Cerebrovasc Dis* 2009;28:119-23.
- 35  
36 44 Lin S F, Chao A C, Hu H H, et al. Hyperglycemia predicts unfavorable outcomes in acute  
37 ischemic stroke patients treated with intravenous thrombolysis among a Chinese population: A  
38 prospective cohort study. *J Neurol Sci* 2018;388:195-202.
- 39  
40 45 Katsura K, Asplund B, Ekholm A, et al. Extra- and Intracellular pH in the Brain During  
41 Ischaemia, Related to Tissue Lactate Content in Normo- and Hypercapnic rats. *Eur J Neurosci*  
42 1992;4:166-76.
- 43  
44 46 Schurr A. Lactate: the ultimate cerebral oxidative energy substrate? *J Cereb Blood Flow*  
45 *Metab* 2006;26:142-52.
- 46  
47 47 Parsons M W, Barber P A, Desmond P M, et al. Acute hyperglycemia adversely affects  
48 stroke outcome: a magnetic resonance imaging and spectroscopy study. *Ann Neurol*  
49 2002;52:20-8.
- 50  
51  
52  
53  
54  
55  
56  
57  
58  
59  
60

**Table 1** Baseline characteristics of patients with AIS

| Demographic characteristics                   | DM Patients      |
|-----------------------------------------------|------------------|
| <i>N</i>                                      | 568              |
| Age(years), median (IQR)                      | 65(55-74)        |
| Male gender, n (%)                            | 377 (66.4)       |
| Vascular risk factors, n (%)                  |                  |
| Hypertension                                  | 398(70.1)        |
| Atrial fibrillation                           | 78(13.7)         |
| Hypercholesterolemia                          | 182 (32.0)       |
| Coronary heart disease                        | 75 (13.2)        |
| Previous TIA or stroke                        | 89 (15.7)        |
| Active smoking                                | 205 (36.1)       |
| Clinical findings                             |                  |
| BMI (kg/m <sup>2</sup> ), mean± SD            | 24.10±2.96       |
| Systolic blood pressure (mmHg), median (IQR)  | 148(130-166)     |
| Diastolic blood pressure (mmHg), median (IQR) | 83(75-93)        |
| TOAST classification, n (%)                   |                  |
| Large-vessel occlusive                        | 177(31.2)        |
| Small-vessel occlusive                        | 318(56.0)        |
| Cardioembolic                                 | 56(9.9)          |
| Other and Unknown                             | 17(3.0)          |
| HbA1c (%), median (IQR)                       | 6.6(5.8-8.3)     |
| FBG (mmol/L), median (IQR)                    | 7.37(5.99-10.10) |
| NIHSS at admission, median (IQR)              | 4(2-10)          |
| Reperfusion therapy, n (%)                    | 32(5.6)          |
| Unfavorable outcome at 3 months, n (%)        | 226(39.8)        |
| Mortality at 3 months, n (%)                  | 58(10.2)         |

AIS acute ischemic stroke; IQR interquartile range; TIA transient ischemic attack; BMI body mass index; SD standard deviation; TOAST Trial of Org 10172 in Acute Stroke Treatment; HbA1c hemoglobin A1c; FBG fasting blood glucose; NIHSS National Institutes of Health Stroke Scale.

**Table 2** Univariable and multivariable logistic regression analyses for unfavorable outcome

| Parameter                  | Univariable analysis |                     |                | Multivariable analysis |                     |                |
|----------------------------|----------------------|---------------------|----------------|------------------------|---------------------|----------------|
|                            | OR                   | 95 %CI <sup>a</sup> | <i>P</i> value | OR                     | 95 %CI <sup>a</sup> | <i>P</i> value |
| Age                        | 1.03                 | 1.01-1.04           | <0.0001        | 1.02                   | 1.00-1.05           | 0.037          |
| Male gender                | 0.63                 | 0.45-0.90           | 0.011          | 0.72                   | 0.40-1.28           | 0.259          |
| Hypertension               | 0.92                 | 0.64-1.33           | 0.659          | —                      |                     |                |
| Atrial fibrillation        | 2.19                 | 1.35-3.55           | 0.001          | 1.99                   | 0.80-5.06           | 0.151          |
| Hypercholesterolemia       | 0.89                 | 0.62-1.28           | 0.530          | —                      |                     |                |
| Coronary heart disease     | 1.89                 | 1.16-3.08           | 0.011          | 1.03                   | 0.47-2.28           | 0.940          |
| Previous TIA or stroke     | 1.29                 | 0.82-2.03           | 0.280          | —                      |                     |                |
| Active Smoking             | 1.08                 | 0.76-1.53           | 0.664          | —                      |                     |                |
| BMI                        | 0.97                 | 0.912-1.02          | 0.226          | —                      |                     |                |
| Systolic blood pressure    | 1.00                 | 1.00-1.01           | 0.966          | —                      |                     |                |
| Diastolic blood pressure   | 1.00                 | 1.00-1.01           | 0.875          | —                      |                     |                |
| Reperfusion therapy        | 0.90                 | 0.43-1.89           | 0.785          | —                      |                     |                |
| NIHSS at admission         | 1.58                 | 1.46-1.70           | <0.0001        | 1.42                   | 1.31-1.55           | <0.0001        |
| Large-vessel occlusive     | 1.12                 | 0.38-3.35           | 0.839          | —                      |                     |                |
| Small-vessel occlusive     | 0.07                 | 0.02-0.19           | <0.0001        | 0.24                   | 0.06-0.93           | 0.039          |
| Cardioembolic <sup>b</sup> | 1.25                 | 0.37-4.72           | 0.717          | —                      |                     |                |
| HbA1c (%)                  | 1.11                 | 1.01-1.23           | 0.038          | 0.84                   | 0.71-1.01           | 0.056          |
| Fasting blood glucose      | 1.38                 | 1.29-1.48           | <0.0001        | 1.25                   | 1.14-1.37           | <0.0001        |

OR odds ratio; CI confidence interval; TIA transient ischemic attack; BMI body mass index; NIHSS National Institutes of Health Stroke Scale

<sup>a</sup> Note that the odds ratio corresponds to a unit increase in the explanatory variable

<sup>b</sup> Other and unknown ischemic stroke subtype as the reference

**Table 3** Univariable and multivariable Cox regression analyses for mortality

| Parameter                | Univariable analysis |                     |                | Multivariable analysis |                     |                |
|--------------------------|----------------------|---------------------|----------------|------------------------|---------------------|----------------|
|                          | HR                   | 95 %CI <sup>a</sup> | <i>P</i> value | HR                     | 95 %CI <sup>a</sup> | <i>P</i> value |
| Age                      | 1.01                 | 1.00-1.03           | 0.252          | —                      |                     |                |
| Male gender              | 0.70                 | 0.42-1.20           | 0.186          | —                      |                     |                |
| Hypertension             | 1.13                 | 0.63-2.00           | 0.684          | —                      |                     |                |
| Atrial fibrillation      | 4.36                 | 2.56-7.41           | <0.0001        | 2.17                   | 1.20-3.93           | 0.011          |
| Hypercholesterolemia     | 0.88                 | 0.50-1.56           | 0.670          | —                      |                     |                |
| Coronary heart disease   | 1.97                 | 1.06-3.65           | 0.031          | 1.44                   | 0.76-2.71           | 0.262          |
| Previous TIA or stroke   | 1.25                 | 0.65-2.42           | 0.499          | —                      |                     |                |
| Active Smoking           | 1.48                 | 0.88-2.49           | 0.135          | —                      |                     |                |
| BMI                      | 0.96                 | 0.88-1.04           | 0.301          | —                      |                     |                |
| Systolic blood pressure  | 0.99                 | 0.98-1.00           | 0.135          | —                      |                     |                |
| Diastolic blood pressure | 1.00                 | 0.98-1.01           | 0.620          | —                      |                     |                |
| Reperfusion therapy      | 1.27                 | 0.46-3.75           | 0.659          | —                      |                     |                |
| NIHSS at admission       | 1.20                 | 1.14-1.20           | <0.0001        | 1.11                   | 1.08-1.15           | <0.0001        |
| Large-vessel occlusive   | 0.88                 | 0.31-2.46           | 0.802          | —                      |                     |                |
| Small-vessel occlusive   | 0.02                 | 0.00-0.13           | <0.0001        | 0.07                   | 0.12-0.38           | 0.002          |
| Cardioembolic            | 1.05                 | 0.35-3.19           | 0.933          | —                      |                     |                |
| HbA1c (%)                | 1.46                 | 1.30-1.65           | <0.0001        | 1.32                   | 1.15-1.51           | <0.0001        |
| Fasting blood glucose    | 1.17                 | 1.12-1.22           | <0.0001        | 1.10                   | 1.03-1.15           | 0.004          |

OR odds ratio; CI confidence interval; TIA transient ischemic attack; BMI body mass index; NIHSS National Institutes of Health Stroke Scale

<sup>a</sup> Note that the odds ratio corresponds to a unit increase in the explanatory variable

<sup>b</sup> Other and unknown ischemic stroke subtype as the reference

1  
2  
3  
4  
5  
6  
7  
8  
9  
10 **Figure 1** The correlation between fasting blood glucose levels and the National Institutes of Health  
11 Stroke Scale (NIHSS); Spearman's analysis ( $r=0.417$ ,  $P<0.0001$ )  
12  
13  
14  
15  
16

17 **Figure 2** Distribution of fasting blood glucose levels in patients with favorable and unfavorable  
18 outcomes. All data are the median and interquartile range (IQR). Mann–Whitney  $U$ -test ( $Z=-11.176$ ,  
19  $P<0.0001$ )  
20  
21  
22  
23  
24  
25

26 **Figure 3** Distribution of fasting blood glucose levels in survivors and non-survivors. All data are the  
27 median and interquartile range (IQR). Mann–Whitney  $U$ -test ( $Z=-6.851$ ,  $P<0.0001$ )  
28  
29  
30  
31  
32  
33  
34  
35  
36  
37

38 **Figure 4** Kaplan–Meier survival based on fasting blood glucose (FBG) quartiles. Time-to-death was  
39 analyzed by Kaplan–Meier curves based on FBG quartiles. Patients in the lower two quartiles (FBG  
40  $\leq 6.00$  mmol/L and  $6.00 < \text{FBG} \leq 7.37$  mmol/L) had a lower risk of mortality compared to patients with  
41 FBG levels in the higher two quartiles (FBG  $> 10.10$  mmol/L and  $7.37 < \text{FBG} \leq 10.10$  mmol/L,  
42  $P<0.0001$ ).  
43  
44  
45  
46  
47  
48  
49  
50  
51  
52  
53  
54  
55  
56  
57  
58  
59  
60

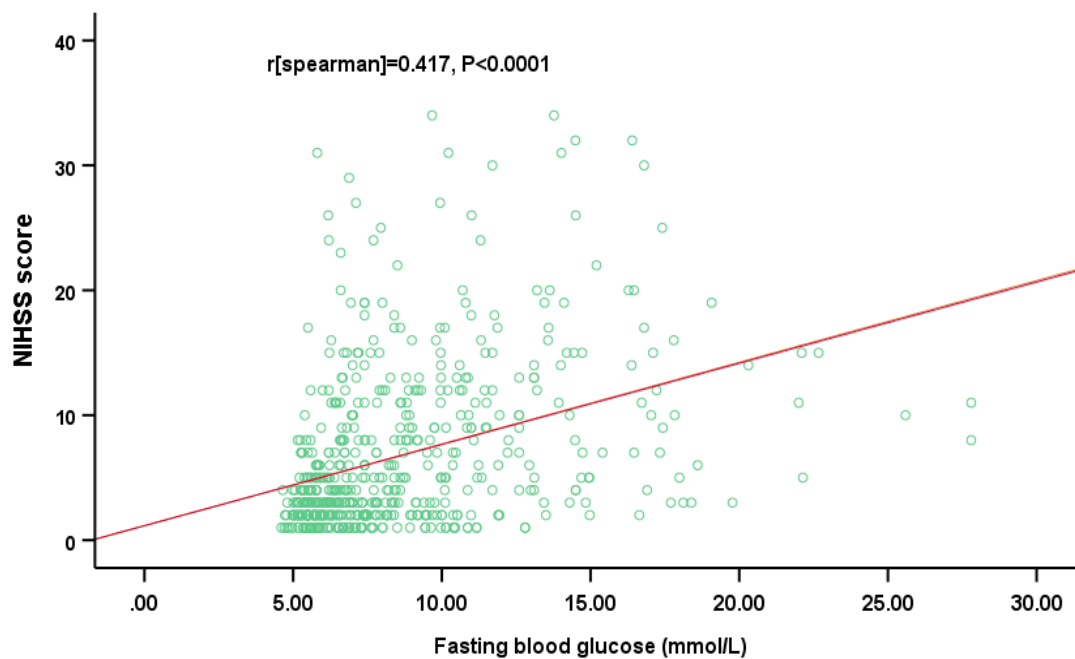

**Figure 1** The correlation between fasting blood glucose levels and the National Institutes of Health Stroke Scale (NIHSS); Spearman's analysis ( $r=0.417, P<0.0001$ ).

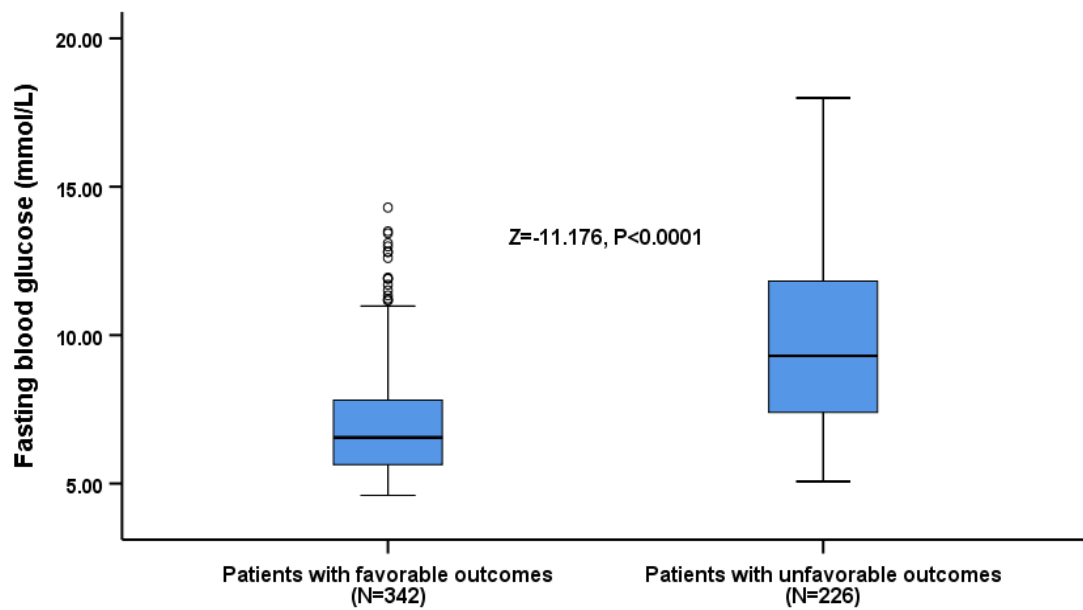

**Figure 2** Distribution of fasting blood glucose levels in patients with favorable and unfavorable outcomes. All data are the median and interquartile range (IQR). Mann-Whitney *U*-test ( $Z=-11.176$ ,  $P<0.0001$ )



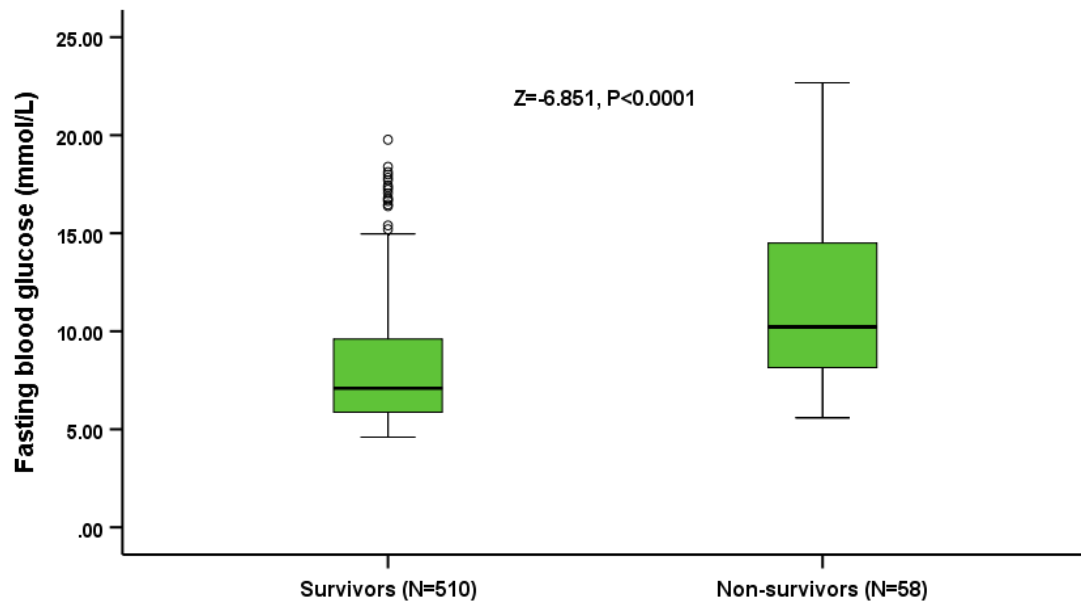

**Figure 3** Distribution of fasting blood glucose levels in survivors and non-survivors. All data are the median and interquartile range (IQR). Mann–Whitney *U*-test ( $Z=-6.851, P<0.0001$ )

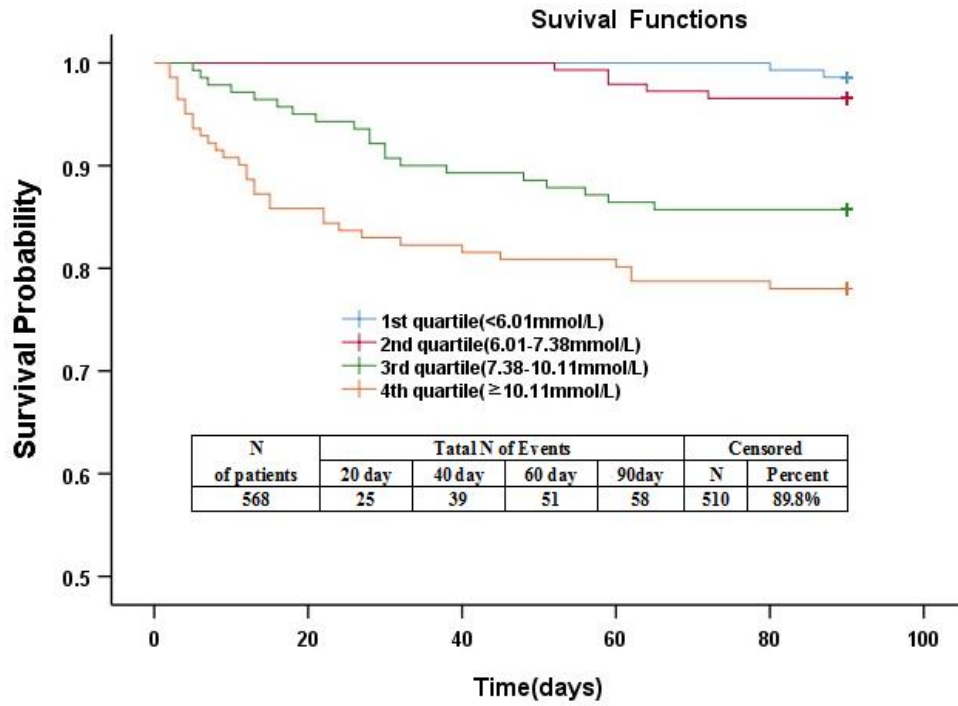

**Figure 4** Kaplan–Meier survival based on fasting blood glucose (FBG) quartiles. Time-to-death was analyzed by Kaplan–Meier curves based on FBG quartiles. Patients in the lower two quartiles (FBG  $\leq 6.00$  mmol/L and  $6.00 < \text{FBG} \leq 7.37$  mmol/L) had a lower risk of mortality compared to patients with FBG levels in the higher two quartiles (FBG  $> 10.10$  mmol/L and  $7.37 < \text{FBG} \leq 10.10$  mmol/L,  $P < 0.0001$ ).

STROBE Statement—Checklist of items that should be included in reports of *cohort studies*

|                              | Item No | Recommendation                                                                                                                                                                                                                                                                                                         | Page No   |
|------------------------------|---------|------------------------------------------------------------------------------------------------------------------------------------------------------------------------------------------------------------------------------------------------------------------------------------------------------------------------|-----------|
| <b>Title and abstract</b>    | 1       | (a) Indicate the study's design with a commonly used term in the title or the abstract<br>(b) Provide in the abstract an informative and balanced summary of what was done and what was found                                                                                                                          | 1, 2<br>2 |
| <b>Introduction</b>          |         |                                                                                                                                                                                                                                                                                                                        |           |
| Background/rationale         | 2       | Explain the scientific background and rationale for the investigation being reported                                                                                                                                                                                                                                   | 3         |
| Objectives                   | 3       | State specific objectives, including any prespecified hypotheses                                                                                                                                                                                                                                                       | 3         |
| <b>Methods</b>               |         |                                                                                                                                                                                                                                                                                                                        |           |
| Study design                 | 4       | Present key elements of study design early in the paper                                                                                                                                                                                                                                                                | 3         |
| Setting                      | 5       | Describe the setting, locations, and relevant dates, including periods of recruitment, exposure, follow-up, and data collection                                                                                                                                                                                        | 3         |
| Participants                 | 6       | (a) Give the eligibility criteria, and the sources and methods of selection of participants. Describe methods of follow-up<br>(b) For matched studies, give matching criteria and number of exposed and unexposed                                                                                                      | 3<br>3    |
| Variables                    | 7       | Clearly define all outcomes, exposures, predictors, potential confounders, and effect modifiers. Give diagnostic criteria, if applicable                                                                                                                                                                               | 3, 4      |
| Data sources/<br>measurement | 8*      | For each variable of interest, give sources of data and details of methods of assessment (measurement). Describe comparability of assessment methods if there is more than one group                                                                                                                                   | 4         |
| Bias                         | 9       | Describe any efforts to address potential sources of bias                                                                                                                                                                                                                                                              |           |
| Study size                   | 10      | Explain how the study size was arrived at                                                                                                                                                                                                                                                                              | 3         |
| Quantitative variables       | 11      | Explain how quantitative variables were handled in the analyses. If applicable, describe which groupings were chosen and why                                                                                                                                                                                           | 3         |
| Statistical methods          | 12      | (a) Describe all statistical methods, including those used to control for confounding<br>(b) Describe any methods used to examine subgroups and interactions<br>(c) Explain how missing data were addressed<br>(d) If applicable, explain how loss to follow-up was addressed<br>(e) Describe any sensitivity analyses | 4<br>4    |
| <b>Results</b>               |         |                                                                                                                                                                                                                                                                                                                        |           |
| Participants                 | 13*     | (a) Report numbers of individuals at each stage of study—eg numbers potentially eligible, examined for eligibility, confirmed eligible, included in the study, completing follow-up, and analysed<br>(b) Give reasons for non-participation at each stage<br>(c) Consider use of a flow diagram                        | 4         |
| Descriptive data             | 14*     | (a) Give characteristics of study participants (eg demographic, clinical, social) and information on exposures and potential confounders<br>(b) Indicate number of participants with missing data for each variable of interest<br>(c) Summarise follow-up time (eg, average and total amount)                         | 4<br>4    |
| Outcome data                 | 15*     | Report numbers of outcome events or summary measures over time                                                                                                                                                                                                                                                         | 4, 5      |

|    |                          |    |                                                                                                                                                                                                              |      |
|----|--------------------------|----|--------------------------------------------------------------------------------------------------------------------------------------------------------------------------------------------------------------|------|
| 1  | Main results             | 16 | (a) Give unadjusted estimates and, if applicable, confounder-adjusted estimates and their precision (eg, 95% confidence interval). Make clear which confounders were adjusted for and why they were included | 5    |
| 2  |                          |    | (b) Report category boundaries when continuous variables were categorized                                                                                                                                    | 5    |
| 3  |                          |    | (c) If relevant, consider translating estimates of relative risk into absolute risk for a meaningful time period                                                                                             | 5    |
| 4  |                          |    |                                                                                                                                                                                                              |      |
| 5  |                          |    |                                                                                                                                                                                                              |      |
| 6  |                          |    |                                                                                                                                                                                                              |      |
| 7  |                          |    |                                                                                                                                                                                                              |      |
| 8  |                          |    |                                                                                                                                                                                                              |      |
| 9  | Other analyses           | 17 | Report other analyses done—eg analyses of subgroups and interactions, and sensitivity analyses                                                                                                               | 5, 6 |
| 10 |                          |    |                                                                                                                                                                                                              |      |
| 11 | <b>Discussion</b>        |    |                                                                                                                                                                                                              |      |
| 12 |                          |    |                                                                                                                                                                                                              |      |
| 13 | Key results              | 18 | Summarise key results with reference to study objectives                                                                                                                                                     | 6    |
| 14 | Limitations              | 19 | Discuss limitations of the study, taking into account sources of potential bias or imprecision. Discuss both direction and magnitude of any potential bias                                                   | 7    |
| 15 |                          |    |                                                                                                                                                                                                              |      |
| 16 | Interpretation           | 20 | Give a cautious overall interpretation of results considering objectives, limitations, multiplicity of analyses, results from similar studies, and other relevant evidence                                   | 7    |
| 17 |                          |    |                                                                                                                                                                                                              |      |
| 18 |                          |    |                                                                                                                                                                                                              |      |
| 19 | Generalisability         | 21 | Discuss the generalisability (external validity) of the study results                                                                                                                                        | 7    |
| 20 |                          |    |                                                                                                                                                                                                              |      |
| 21 | <b>Other information</b> |    |                                                                                                                                                                                                              |      |
| 22 | Funding                  | 22 | Give the source of funding and the role of the funders for the present study and, if applicable, for the original study on which the present article is based                                                | 8    |
| 23 |                          |    |                                                                                                                                                                                                              |      |
| 24 |                          |    |                                                                                                                                                                                                              |      |

\*Give information separately for exposed and unexposed groups.

**Note:** An Explanation and Elaboration article discusses each checklist item and gives methodological background and published examples of transparent reporting. The STROBE checklist is best used in conjunction with this article (freely available on the Web sites of PLoS Medicine at <http://www.plosmedicine.org/>, Annals of Internal Medicine at <http://www.annals.org/>, and Epidemiology at <http://www.epidem.com/>). Information on the STROBE Initiative is available at <http://www.strobe-statement.org>.
